# Oxygen restriction induces a viable but non-culturable population in bacteria

## Running title:

Oxygen restriction induces VBNC bacteria

## Authors:

Lasse Kvich <sup>b</sup>, Blaine G. Fritz <sup>b</sup> Stephanie Crone <sup>b</sup>, Kasper N. Kragh <sup>b</sup>, Mette Kolpen <sup>a</sup>, Majken Sønderholm <sup>b</sup>, Mikael Andersson <sup>c</sup>, Anders Koch <sup>cd</sup>, Peter Ø. Jensen <sup>ab\*</sup>, Thomas Bjarnsholt <sup>ab\*</sup>

\* Corresponding authors

## Author affiliation:

<sup>a</sup> Department of Clinical Microbiology, Copenhagen University Hospital – Rigshospitalet, Copenhagen, Denmark.

<sup>b</sup> Costerton Biofilm Center, Department of Immunology and Microbiology, Faculty of Health and Medical Sciences, University of Copenhagen, Denmark.

<sup>c</sup> Department of Epidemiology Research, Statens Serum Institut, Copenhagen, Denmark.

<sup>d</sup> Department of Infectious Diseases, Copenhagen University Hospital – Rigshospitalet, Copenhagen, Denmark.

## Corresponding authors:

Professor Thomas Bjarnsholt

Costerton Biofilm Center

Department of Immunology and Microbiology

University of Copenhagen

Blegdamsvej 3b, Room 22.2.22

DK-2200 Copenhagen N

Denmark.

Tlf: +45 2065 9888

tbjarnsholt@sund.ku.dk

Associated Professor Peter Ø. Jensen

Costerton Biofilm Center

Department of Immunology and Microbiology

University of Copenhagen

Blegdamsvej 3b, Room 24.1.14

DK-2200 Copenhagen N

Denmark.

Tlf: +45 3031 9073

peter.oestrup.jensen@regionh.dk

**Abstract: 154 words**

**Paper: 6122 words**

## Abstract

This study examined whether anoxic conditioning induces viable but non-culturable (VBNC) bacteria during biofilm growth and if reactive oxygen species (ROS) contribute to this loss of culturability. A significant subpopulation of VBNC *Pseudomonas aeruginosa* was induced by anoxic conditioning, ranging from 5 to 90 % of the total population, in both planktonic and biofilm models. Anoxic conditioning also induced VBNC subpopulations of *Staphylococcus aureus* and *Staphylococcus epidermidis*. Resuscitation of the VBNC population was achieved by substituting 10 mM NO<sub>3</sub><sup>-</sup> as an alternative electron acceptor or, in the case of *P. aeruginosa*, by adding sodium pyruvate as a ROS scavenger during normoxic incubation. Bacterial detection in clinical samples was improved by supplementing 10 mM NO<sub>3</sub><sup>-</sup> to LB plates and incubating under anoxic conditions. These results demonstrate that habituation to an infectious anoxic micro-environment complicates diagnostic culturing of bacteria, especially in the case of chronic infections where oxygen is restricted due to the host immune response.

Keywords:

**anoxia / biofilm / *P. aeruginosa* / reactive oxygen species / viable but non-culturable**

## Background

Bacteria cultured in laboratories only represent a small fraction of the bacteria found in nature. It is estimated that less than 1 % of environmental bacteria can grow on standard laboratory media (Davey, 2011). This phenomenon is also present in clinical diagnostics where detection of bacteria by 16S rDNA-PCR often detects a wider variety of bacteria than conventional, growth-dependent methods (Costerton, Post *et al.*, 2011, Grif, Heller *et al.*, 2012, Meyer, Franke *et al.*, 2014). Clinical laboratories often culture bacteria with enriched media, developed to support the growth of particular pathogens. However, even these human bacterial pathogens can enter a growth-restricted, transient state resulting in loss of culturability, especially following antibiotic treatment (Pasquaroli, Zandri *et al.*, 2013). These bacteria are termed viable but non-culturable (VBNC) and are defined by their lack of growth during conventional plating (Oliver, 2010). They are, nonetheless, viable and may still be virulent (Ramamurthy, Ghosh *et al.*, 2014). VBNC bacteria are characterized by low metabolic activity, significant cell dwarfing, altered cell-wall composition, decreased respiration and decreased macromolecule biosynthesis (Li, Mendis *et al.*, 2014, Oliver, 2010). VBNC bacteria are apparent by microscopic identification in clinical cases presenting sign of infection, but no positive cultures (Bjarnsholt, Tolker-Nielsen *et al.*, 2009, Burmølle, Thomsen *et al.*, 2010, Costerton *et al.*, 2011, Stewart, 2012). These cases are especially prevalent during chronic infection, where lack of culturability prevents proper diagnosis and treatment (Costerton *et al.*, 2011, Høiby, Bjarnsholt *et al.*, 2010, Høiby, Bjarnsholt *et al.*, 2015). Several environmental stresses may induce a VBNC state, e.g. change in temperature or pH, nutrient starvation, change in osmotic concentrations and presence of heavy metals or antibiotics (Oliver, 2010). Oxygen (O<sub>2</sub>) starvation can also induce a VBNC state in batch cultures of *Pseudomonas aeruginosa*, but supplementation with nitrate (NO<sub>3</sub><sup>-</sup>) as an alternative electron acceptor during anoxic plating restores culturability (Binnerup, 1993). This suggests that anoxic

conditioning sensitizes a subpopulation of *P. aeruginosa* to O<sub>2</sub> or its toxic derivatives, such as reactive oxygen species (ROS). Presence of ROS has, in some studies, been shown to generate VBNC bacteria (Noor, 2015, Oliver, 2010), but most research has focused on *Escherichia coli* strains or *Vibrio* spp., while the effects of ROS on *P. aeruginosa* are not well characterized. Evidence of anoxic zones and anaerobic bacterial activity in chronic infections suggests that colonizing bacteria, such as *P. aeruginosa*, experience O<sub>2</sub> starvation (Worlitzsch, Tarran *et al.*, 2002; Hassett, Cuppoletti *et al.*, 2002; Kolpen, Kühl *et al.*, 2014). High rates of O<sub>2</sub> consumption by polymorphonuclear leukocytes generate local, anoxic zones and likely play a major role in O<sub>2</sub> depletion during chronic infection (Høiby *et al.*, 2015, Kolpen, Bjarnsholt *et al.*, 2014, Kolpen, Hansen *et al.*, 2010). Many chronic infections are thought to contain bacteria in the biofilm mode of growth (Costerton, Veeh *et al.*, 2003) and endogenous O<sub>2</sub> depletion inside the biofilm (Sønderholm, Koren *et al.*, 2018), along with intense O<sub>2</sub> consumption by the host immune response (James, Ge Zhao *et al.*, 2016, Jensen, Kolpen *et al.*, 2017, Kragh, Alhede *et al.*, 2014, Trunk, Benkert *et al.*, 2010, Worlitzsch, Tarran *et al.*, 2002), may therefore increase the number of VBNC bacteria. Lack of growth in diagnostic clinical cultures may lead to incorrect diagnosis, thus preventing optimal treatment. In the worst case, samples appear negative despite a true infection, leading to insufficient treatment for the patient.

This study aimed to determine whether anoxic conditioning generates VBNC cells during biofilm growth. Furthermore, we investigated whether ROS are involved in the loss of culturability. Finally, we evaluated the efficiency of two novel, anoxic growth medias to grow bacteria from clinical samples with suspected biofilm infection.

# Results

## Anoxic conditioning induced oxygen intolerant subpopulations of *P. aeruginosa* in biofilm and planktonic models.

To examine if anoxic conditioning during biofilm growth affects the subsequent normoxic and anoxic plating, *P. aeruginosa* was grown in an alginate bead biofilm model (Sønderholm, Kragh *et al.*, 2017). Viable plate counts (CFU/mL) were performed on LB plates supplemented with 10 mM  $\text{NO}_3^-$ . Plates were incubated under normoxic and anoxic conditions (plating method) and plate counts were compared from the beads (biofilm) and the surrounding media (planktonic) of the same vials over a period of 21 days (Figure 1A and 1B, respectively). The log difference was significantly ( $p = 0.003$ ) higher for biofilm than planktonic cells (Figure 1C). The cells represented by this difference were considered VBNC and ranged from 5 to 54 % of the entire population from day 6 to day 19 (Appendix Figure S1).

*P. aeruginosa* was also grown anoxically or normoxically on a filter biofilm model using LB plates supplemented with 10 mM  $\text{NO}_3^-$  over a period of 17 days. CFU/mL was then determined using anoxic and normoxic plating, as above (Figure 2A and 2B, respectively). The log difference between plating methods was significantly ( $p = 0.01$ ) higher for anoxically conditioned biofilms than normoxically conditioned biofilms (Figure 2C). The fraction of VBNC *P. aeruginosa* ranged from 6 to 23 % of the entire population from day 3 to day 17 (Appendix Figure S1).

Similar results were obtained for anoxically and normoxically conditioned planktonic batch cultures of *P. aeruginosa* over a period of 28 days (Figure 3A and 3B, respectively). The log difference between plating methods was significantly ( $p < 0.0001$ ) higher for anoxically conditioned batch cultures (Figure 3C). The fraction of VBNC bacteria ranged from 60 to 90 % of the entire population from day 9 to 21 (Appendix Figure S1).

To further investigate the effect of anoxic conditioning, colonies of *P. aeruginosa* were grown on LB plates supplemented with 10 mM  $\text{NO}_3^-$  under anoxic and normoxic conditions over a period of 20 days (Figure 4A and 4B, respectively). The log difference between plating methods was significantly higher ( $p < 0.0001$ ) for anoxically conditioned colonies (Figure 4C). The fraction of VBNC *P. aeruginosa* ranged from 12 to 46 % of the whole population from day 6 to 20 (Appendix Figure S1).

### **10 mM $\text{NO}_3^-$ in LB plates did not affect CFU/mL in batch cultures of *P. aeruginosa*.**

To ensure that presence of  $\text{NO}_3^-$  did not affect the number of CFU generated on LB plates, CFU/mL was determined anoxically (LB plates + 10 mM  $\text{NO}_3^-$ ) and normoxically (LB plates +/- 10 mM  $\text{NO}_3^-$ ) from 24-hour-old batch cultures of *P. aeruginosa*. We found no difference between types of incubation ( $p = 0.93$ ): anoxic log CFU/mL +  $\text{NO}_3^- = 9.96 (\pm 0.22)$ , normoxic log CFU/mL +  $\text{NO}_3^- = 9.91 (\pm 0.10)$  and normoxic log CFU/mL -  $\text{NO}_3^- = 9.91 (\pm 0.14)$ . Furthermore, there was no effect of  $\text{NO}_3^-$  supplementation on normoxic CFU/mL determinations in the prolonged experiment with 28-day-old batch cultures (Figure 3A and 3B). It was not possible to detect growth of *P. aeruginosa* on LB plates under anoxic conditions without  $\text{NO}_3^-$ , but growth was observed when these plates were placed under normoxic conditions.

### **Oxidative stress restricted the growth of anoxically conditioned *P. aeruginosa* when re-grown in a normoxic environment.**

To investigate whether formation of ROS contributed to the VBNC state induced by anoxic conditioning, bacteria from 16-day-old anoxically conditioned batch cultures of *P. aeruginosa* were plated on LB plates with and without 0.3 % sodium pyruvate. The presence of sodium pyruvate as a ROS scavenger (Wang, Perez *et al.*, 2007) significantly ( $p = 0.02$ ) increased normoxic CFU/mL

compared to incubation without sodium pyruvate (Figure 5A). This was not the case in 24-hour-old batch cultures of *P. aeruginosa* ( $p = 0.62$ ), indicating that the effect was restricted to anoxically conditioned cells (Figure 5B). This experiment was then repeated with a catalase deficient *P. aeruginosa* mutant ( $\Delta katA$  PAO1), which is more susceptible to oxidative stress (Hassett, Ma *et al.*, 1999, Jensen, Briales *et al.*, 2014). The log difference between plating methods for the  $\Delta katA$  mutant and reference strain was significantly ( $p = 0.00002$ , unpaired t-test) different. These log difference values were  $3.02 \pm 0.05$  and  $1.61 \pm 0.07$  for  $\Delta katA$  PAO1 and the reference strain, respectively (Figure 5C).

#### **Direct viable count with LIVE/DEAD staining revealed a larger population of VBNC *P. aeruginosa*.**

Direct viable counts were carried out for 16-day-old, anoxically conditioned batch cultures to estimate the size of the VBNC population. Findings were compared to normoxic and anoxic plate counts performed on LB plates supplemented with 10 mM  $\text{NO}_3^-$  (Appendix Figure S2-B). Anoxic incubation yielded a significantly ( $p = 0.002$ ) higher CFU/mL than normoxic incubation ( $0.85 \log$  values  $\pm 0.04$ ), as expected. When determining bacterial counts with direct viable counting, a significant higher number of viable cells could be calculated compared to normoxic incubation ( $2.31 \log$  values  $\pm 0.4$ ,  $p = 0.002$ ) and anoxic incubation ( $1.46 \log$  values  $\pm 0.5$ ,  $p = 0.008$ ). Direct viable counts were also performed on a 24-hour-old batch culture to investigate whether findings of VBNC *P. aeruginosa* was restricted to anoxically conditioned cells. No difference of bacterial counts were observed (Appendix Figure S2-A).

#### **Anoxic conditioning affects *Staphylococcus aureus* and *Staphylococcus epidermidis* but not *Escherichia coli* and *Enterococcus faecalis***

The effect of anoxic conditioning was then tested on a selected group of pathogens to determine if this phenomenon was restricted to *P. aeruginosa*. *S. aureus* (methicillin susceptible) was tested as described in the *P. aeruginosa* filter biofilm setup. Viable plate counts for anoxic and normoxic conditioned filters was determined (Figure 6A and 6B, respectively). The log difference between plating method was significantly higher ( $p < 0.001$ ) when viable plate counts were performed from anoxically conditioned filter biofilms than from normoxically conditioned filter biofilms (Figure 6C). The fraction of VBNC methicillin susceptible *S. aureus* ranged from 3 to 89 % of the entire population from day 1 to day 17 (Appendix Figure S1). Since both *P. aeruginosa* and *S. aureus* demonstrated effects of anoxic conditioning, a smaller experiment was initiated to test other pathogens. The effect of anoxic conditioning was determined on LB plates supplemented with 10 mM  $\text{NO}_3^-$  with and without sodium pyruvate to investigate if ROS were involved in the lack of growth. Both *S. aureus* (MRSA) and *S. epidermidis* showed effects of anoxic conditioning, resulting in an significant ( $p = 0.01$  and  $p = 0.03$ , respectively) increase in CFU/mL during anoxic incubation compared to normoxic incubation (Appendix Figure S3). There was no observed effect of sodium pyruvate during normoxic incubation for these two strains. In the case of *E. coli* and *E. faecalis*, there was no observed effect of anoxic conditioning (Appendix Figure S4).

# **Implementation of a supplementary diagnostic media increased findings from samples where biofilm infections could be expected.**

To determine the effect of VBNC on the outcome of culturing from patient samples, LB and ABTG plates supplemented with 10 mM  $\text{NO}_3^-$  were introduced as an anoxic growth media in addition to standard culturing practices at the Department of Clinical Microbiology, Rigshospitalet, Copenhagen, Denmark. A total of 135 samples were consecutively collected from 73 patients. Only samples from sterile parts of the body, e.g. soft tissues and bones, were included. Appendix Figure



S5 A and B show the distribution of bacterial findings from the conventional method compared with LB and ABTG plates supplemented with 10 mM NO<sub>3</sub><sup>-</sup>. When comparing LB plates supplemented with 10 mM NO<sub>3</sub><sup>-</sup> and the conventional method, an equally number of culture positive samples (45 vs. 50) were identified, resulting in 27 and 28 patients with culture positive findings, respectively (Appendix Figure S5 B). Interestingly, 19 microorganisms from 16 patients were found exclusively on LB plates supplemented with 10 mM NO<sub>3</sub><sup>-</sup> and in 5 cases (6.9 %), only NO<sub>3</sub><sup>-</sup> supplemented LB plates were culture positive (Table 1). The clinical significance of these observations was not possible to investigate due to Danish legislation regarding access to patient files. The use of ABTG plates supplemented with 10 mM NO<sub>3</sub><sup>-</sup> did not provide significant benefit for growing microorganisms from clinical samples (Appendix Figure S5 A).

## Discussion

### VBNC *P. aeruginosa*

In the current study, we demonstrate that viable plate counting with *P. aeruginosa* is significantly affected by anoxic conditioning when cultured in the presence of atmospheric oxygen levels. Oxygen intolerant subpopulations are created after only a few days of anoxic conditioning in both biofilm and planktonic models. VBNC *P. aeruginosa* was observed in the beads from the bead biofilm model, but not in the surrounding suspension, despite that the cultures had full access to atmospheric oxygen. This indicates that oxygen restriction within a biofilm induces a VBNC subpopulation. To our knowledge, it has not previously been reported that a VBNC state can be induced in a *P. aeruginosa* biofilm. However, this has been demonstrated in *S. epidermidis* biofilms (Cerca, Trigo *et al.*, 2011). The VBNC state, detected as increased growth during anoxic incubation with NO<sub>3</sub><sup>-</sup>, has previously been generated in planktonic *P. aeruginosa* by energy starvation after cultivation without O<sub>2</sub> as

electron acceptor for aerobic respiration (Binnerup, 1993). *In vitro* biofilms of *P. aeruginosa* may contain internal anoxic zones (Kolpen, Mousavi *et al.*, 2016, Walters, Roe *et al.*, 2003), so we hypothesized that anoxia inside the biofilm contributes to the induction of VBNC *P. aeruginosa*. Accordingly, VBNC *P. aeruginosa* was only observed in the filter biofilm model and the colony model when the model was anoxically conditioned. Furthermore, VBNC *P. aeruginosa* was also induced in planktonic cultures by anoxic conditioning.

In the present study, it appears that approximately 50 % of the population in the alginate beads was VBNC even though they were kept in normoxically-conditioned vials. In comparison, the fraction of VBNC organisms was approximately 90 % in the anoxically conditioned batch cultures. The difference (90 % vs. 50 %) may be explained by the fact that the majority of the bacteria in the beads are peripherally located where they have increased access to oxygen compared to the center of the beads (Sønderholm *et al.*, 2017). In comparison, bacteria from the anoxically conditioned batch cultures were fully deprived of O<sub>2</sub>. The observed difference in viable plate counts between normoxic and anoxic incubation in the bead model could be of crucial importance in a clinical setting, as it affects the number of organisms that can be cultured.

In the present study, the effect of anoxic conditioning was restricted to an intermediate period. This is probably an artefact due to the static methodological setup. Dynamic processes, such as entry of nutrients and removal of waste, occur during infection and are not modeled here (Brown, Palmer *et al.*, 2008). Nevertheless, this is not the first time a “resuscitation window” has been described for VBNC bacteria. Similar studies have shown that VBNC bacteria can only be detected in an intermediate period of culturing (Pinto, Santos *et al.*, 2015).

#### **ROS restricts growth of anoxic conditioned *P. aeruginosa***

The VBNC fraction of bacteria in this study appeared to be O<sub>2</sub> intolerant given that growth only was achievable when NO<sub>3</sub><sup>-</sup> served as an alternative electron acceptor during anaerobic respiration.

251 This led us to investigate whether this phenomena was due to oxidizing properties of ROS created  
 252 by incomplete reduction of O<sub>2</sub> during aerobic respiration (Fenchel & Finlay, 2008). Sodium  
 253 pyruvate increased viable counts under normoxic incubation (roughly 43 % of the VBNC  
 254 population) and we believe that it was due to its properties as a ROS scavenger (Wang *et al.*, 2007).  
 255 Accordingly, 0.3 % sodium pyruvate has been used to resuscitate VBNC populations of *S. aureus*  
 256 (Pasquaroli *et al.*, 2013). It has been suggested that VBNC cells cannot be resuscitated by addition  
 257 of ROS scavengers and that “revived” cells in the presence of ROS scavengers are only injured cells  
 258 and not VBNC cells (Pinto *et al.*, 2015). It was not possible to determine whether bacteria were in  
 259 an injured state in this study. Instead, the effect of ROS was further confirmed with a catalase A  
 260 deficient *P. aeruginosa* mutant ( $\Delta katA$  PAO1). The difference between normoxic and anoxic CFU  
 261 counts were significantly greater than the difference observed with the reference strain *P.*  
 262 *aeruginosa* grown under same conditions. In contrary, anoxic CFU determination of  $\Delta katA$  PAO1  
 263 yielded almost as many CFU as it did with the reference strain. These results indicate that  
 264 accumulation of H<sub>2</sub>O<sub>2</sub> during aerobic respiration has an impact on viable plate counting when *P.*  
 265 *aeruginosa* has been anoxically conditioned.

## 266 **Direct viable counting reveals a larger VBNC population**

267 To account for the limitations of plate counting, direct viable counts were conducted to investigate  
 268 whether the viable population was larger than observed during plating with NO<sub>3</sub><sup>-</sup> supplementation.  
 269 When comparing plate counts from 16-day-old anoxic conditioned batch cultures, we were able to  
 270 show that anoxic incubation increased the number of viable cells with 0.85 log values compared to  
 271 normoxic plate counting, thus 86 % of the population was VBNC. When comparing direct viable  
 272 counting with normoxic viable plate counts, we observed a difference of 2.31 log values, thus the  
 273 “real” fraction of VBNC *P. aeruginosa* was 99.68 %. As all methods, direct viable counting has its  
 274 limitations. LIVE/DEAD staining is based upon membrane permeability and is only an

approximation of true viability. Cells that were stained both red and green (resulting in yellow) were counted as dead cells, but may still be viable.

### ***S. epidermidis* and *S. aureus* also become VBNC after anoxic conditioning**

Additional experiments were conducted to elucidate whether anoxic conditioning induces VBNC cells in other facultative pathogens. Filter biofilms of methicillin susceptible *S. aureus* showed the same effects of anoxic conditioning as *P. aeruginosa*. The difference between normoxic and anoxic plating for anoxically conditioned filters was significantly ( $p < 0.001$ ) higher than the difference observed for normoxically conditioned filters. These experiments were also repeated for *S. epidermidis*, *S. aureus* (MRSA), *E. coli* and *E. faecalis*. Additionally, CFU was determined on LB plates supplemented with  $\text{NO}_3^-$  with and without sodium pyruvate to see if ROS was involved in a loss of cultivability. Both *S. epidermidis* and *S. aureus* were significantly ( $p = 0.01$  and  $p = 0.03$ , respectively) affected by anoxic conditioning, whereas *E. coli* and *E. faecalis* were not. No effect of sodium pyruvate was found during normoxic incubation for any of these tested organisms, suggesting that ROS is not involved in the loss of culturability for these pathogens, but additional ROS scavengers should be tested.

### **Efficacy of LB plates supplemented with $\text{NO}_3^-$ in a clinical setting**

LB plates supplemented with  $\text{NO}_3^-$  were tested in a clinical setting and enabled detection of bacteria in almost as many patients as the conventional method (27 vs. 28, respectively). Findings of microorganisms ( $n=19$  in 16 patients) exclusively detected on LB plates supplemented with  $\text{NO}_3^-$  were primarily “low-virulent” bacteria. These samples often also contained “highly virulent” bacteria. “Highly virulent” bacteria grew equally well on both LB plates supplemented with  $\text{NO}_3^-$  and with the conventional method. With the exception of *Helcococcus kunzii*, all identified bacteria detected exclusively by LB plates supplemented with  $\text{NO}_3^-$  were known to harbor nitrate reductase, enabling reduction of  $\text{NO}_3^-$ . Furthermore, according to the literature, all identified bacteria are able

to produce biofilm and have been associated with chronic infections (Table 1). LB plates supplemented with  $\text{NO}_3^-$  detected growth in 6.9 % of patients (n=5, mostly Staphylococcal species), whereas the conventional method did not. These organisms are often associated with chronic infections, although they are considered “low virulent” (Rogers, Fey *et al.*, 2009). These findings indicate that anoxic LB agar plates supplemented with  $\text{NO}_3^-$  may be useful as a supplementary medium for the cultivation of “low-virulent” bacteria from chronic infections.

The VBNC state is thought to be a stress response to harsh environments. This is supported by findings that changes in pH, temperature, nutrient starvation, oxygen depletion combined with low redox potential and antimicrobial substances can induce the VBNC state (Mascher, Hase *et al.*, 2000, Oliver, 2010, Pasquaroli *et al.*, 2013). Recently, Li *et al.* (2014) listed 51 human pathogens that were able to enter the VBNC state, including *P. aeruginosa*. Only 26 of these pathogens were resuscitated, possibly due to inadequate culture methods (Li *et al.*, 2014). The list was later extended to 68 human pathogens (Pinto *et al.*, 2015). As interest within the phenomena of VBNC cells grows, it becomes more apparent that it may be a universal trait for bacteria.

The fact that bacteria can return to a viable state supports the hypothesis that VBNC is a survival strategy. Another hypothesis suggests that the VBNC state is a transition state of a degenerating bacterial population leading to cell death, but there is shortage of evidence supporting this hypothesis, why the first hypothesis is generally more accepted (Li *et al.*, 2014).

Our results suggest that habituation to the environment prior to regrowth should be considered in the case of pathogens such as *P. aeruginosa*, *S. aureus* and *S. epidermidis* and possibly other facultative organisms.

## Conclusion

The VBNC state can be induced by several physiological stresses and our knowledge in this area is expanding, though far from fully resolved. We demonstrate that a VBNC subpopulation is induced by anoxic conditioning during biofilm growth in *P. aeruginosa*, *S. aureus* and *S. epidermidis*. The VBNC population was only able to grow under anoxic conditions in the presence of  $\text{NO}_3^-$  as an alternative electron acceptor. In the case of *P. aeruginosa*, this phenomenon was, in part, explained by creation of lethal amounts of ROS during aerobic respiration and the bacteria's inability to neutralize it. LB plates supplemented with 10 mM  $\text{NO}_3^-$  were an effective, anoxic growth medium for resuscitation of anoxically conditioned *P. aeruginosa*, and improved bacterial growth in clinical samples.

## Materials and Method

### Bacterial strains

*Pseudomonas aeruginosa* (PAO1, ATCC 15692), a catalase A deficient *Pseudomonas aeruginosa* strain ( $\Delta\text{katA}$  PAO1) (Hassett *et al.*, 1999), *Staphylococcus epidermidis* ATCC 14990, *Staphylococcus aureus* NCTC 8325-4 (methicillin susceptible) (Frees, Chastanet *et al.*, 2004), *Staphylococcus aureus* USA300 JE2 (MRSA) (Fey, Endres *et al.*, 2013), *Escherichia coli* CFT073 (Welch, Burland *et al.*, 2002) and a clinical strain of *Enterococcus faecalis* from the Department of Clinical Microbiology, Copenhagen University Hospital – Rigshospitalet, Denmark were used in this study.

### Agar plates and media

Primarily lysogeny broth (LB) agar plates were applied in this study. Lysogeny broth (pH 7.5) consisted of 5 g/L yeast extract (Oxoid, Roskilde, Denmark), 10 g/L tryptone (Oxoid), 10 g/L NaCl (Merck, USA). Both LB and minimum media plates were tested as supplementary anoxic growth media for clinical samples. Minimum media consisted of Btrace media buffered with 10% A-10

phosphate buffer and supplemented with 0.5 % (w/v) glucose (Panum Institute Substrate Department, DK), referred to as ABTG media throughout the paper. All plates contained 2 % agarose. Plates used for anoxic growth were supplemented with 10 mM KNO<sub>3</sub> (Sigma-Aldrich, USA) to serve as alternative electron acceptor, referred to as NO<sub>3</sub><sup>-</sup> throughout the paper. All agar plates and media in this study were supplied by the Panum Institute Substrate Department (Copenhagen, DK).

### **Anoxic growth**

Experiments investigating growth under anoxic conditions were performed in an anaerobic chamber (Concept 400 Anaerobic Workstation, Ruskinn Technology Ltd, UK). The gas atmosphere consisted of N<sub>2</sub>/H<sub>2</sub>/CO<sub>2</sub> (ratio - 80:10:10). Anoxic chamber environment was confirmed with an oxygen sensor (HQ40d multi, HACH Company, USA). All media and chemical solutions used in anaerobic experiments were equilibrated in the anaerobic chamber 3 days prior to experiment. In the case of solutions requiring refrigeration, a minimal volume was applied (< 1 mL), sealed with Parafilm M, and thoroughly shaken upon entry into anaerobic chamber for quick gas equilibration.

### **Bead-embedded inoculum of *P. aeruginosa***

Preparation of alginate beads with *P. aeruginosa* was carried out according to a method described by S nderholm *et al.* (2017). Subsequently, beads were divided (10 beads per vial) into vials (Oximate Vial, PerkinElmer Inc., USA) containing 15 mL LB medium. Vials were sealed with Parafilm M incubated at 37 C on an orbital shaker at 180 rpm. Anoxic and normoxic CFU counts were determined from beads and from the surrounding suspension from the same vials on each sampling day (day 3, 6, 8, 12, 19 and 21). Two beads were sampled per biological replicate (4 biological replicates in total). Before determination of CFU, the beads were washed twice with 0.9 % NaCl to remove non-attached cells and transferred to 1.5 mL microcentrifuge tubes (Sigma-Aldrich, USA). One-hundred microliters of 0.1 M sodium carbonate (Na<sub>2</sub>CO<sub>3</sub>) followed by 100  L



of 0.04 M citric acid was added to the tubes to dissolve the beads. The suspensions were then sonicated (5 min degas + 5 minutes sonication; Bransonic ultrasonic cleaner 2510, Emerson Electric, USA) before ten-fold dilution series were performed in 0.9 % NaCl. CFU was determined by plating three, 10  $\mu$ L-drops per dilution per replicate. Anoxic CFU determinations were performed inside an anaerobic chamber on LB plates supplemented with 10 mM  $\text{NO}_3^-$ . The same dilution method was applied to normoxic CFU determination outside the anaerobic chamber on LB plates with 10 mM  $\text{NO}_3^-$ . Plates were incubated 2 days before counting CFU.

### **Filter biofilms with *P. aeruginosa***

This protocol was adapted to grow reproducible biofilms under anoxic and normoxic conditions. The method has previously been described by Bjarnsholt *et al.* (2015). The filter biofilms were kept on the same LB plates throughout the experiment. *P. aeruginosa* was propagated from frozen stock and grown overnight in 20 mL LB medium at 37°C on an orbital shaker at 180 rpm. Cultures were adjusted to an optical density of 0.05 ( $\text{OD}_{600}$ ; UV spectrophotometer UV-1800 UV-VIS, Shimadzu corporation, JP) and 10  $\mu$ L was transferred to the cellulose nitrate membrane filters (25 mm in diameter, GE Healthcare Life Sciences, UK). Plates were incubated under normoxic and anoxic conditions and kept in plastic bags with wet paper to avoid dehydration. Two filters were sampled per biological replicate (4 biological replicates in total) on each sampling day (day 1, 3, 7, 15 and 17). Filters were removed, placed in 10 mL tubes containing 5 mL 0.9 % NaCl, vortexed thoroughly (1 min) and sonicated (5 min degas + 5 minutes sonication). A ten-fold dilution series was performed in 0.9 % NaCl and normoxic and anoxic CFU were determined by plating three 10  $\mu$ L-drops per filter on LB plates supplemented with 10 mM  $\text{NO}_3^-$ . Plates were incubated for 2 days before counting CFU. The anoxic setup was conducted in an anaerobic chamber and CFU determination was carried out in the same way as the normoxic setup.

### **Liquid batch cultures of *P. aeruginosa***



395 *P. aeruginosa* was propagated from frozen stock and grown overnight in 20 mL LB media at 37°C  
 396 and orbitally shaken at 180 rpm. Cultures were adjusted to an optical density (OD<sub>600</sub>) of 0.1 in glass  
 397 vials (Oximate Vial) with a final volume of 20 mL LB. Vials were left to incubate at 37°C and  
 398 orbitally shaken at 180 rpm. To create a normoxic environment, half of the vials were incubated  
 399 with Parafilm M on top (normoxic conditioning), while the rest were incubated with a lid on top  
 400 creating an anoxic environment (anoxic conditioning). Anoxic and normoxic determination of CFU  
 401 was carried out from normoxic and anoxic conditioned liquid batch cultures (referred to as batch  
 402 cultures throughout the paper) on each sampling day (day 1, 3, 5, 9, 11, 14, 16, 18, 21 and 28).  
 403 Normoxic CFU determination was carried out on LB plates with and without 10 mM NO<sub>3</sub><sup>-</sup> to test  
 404 whether presence of NO<sub>3</sub><sup>-</sup> affected the number of CFU. Two mL (2 x 1 mL = 2 technical replicates)  
 405 were sampled per biological replicate (4 biological replicates in total) on each sampling day.  
 406 CFU/mL was determined as described in previous sections.

#### 407 **Colonies of *P. aeruginosa***

408 *P. aeruginosa* was propagated from frozen stock and grown overnight in 20 mL LB media at 37°C  
 409 on an orbital shaker at 180 rpm. The cultures were then streaked onto LB plates supplemented with  
 410 10 mM NO<sub>3</sub><sup>-</sup>. Plates were incubated under normoxic and anoxic conditions and kept in plastic bags  
 411 with wet paper to avoid dehydration. A 1 µL loop was used to sample colony material from each  
 412 biological replicate (3 biological replicates in total) on each sampling day (day 6, 9, 13, 15 and 20).  
 413 Colonies were transferred to 1.5mL microcentrifuge tubes (Sigma-Aldrich, Denmark) with 0.5 mL  
 414 0.9 % NaCl, vortexed thoroughly (1 min) and sonicated (5 min degas + 5 minutes sonication).  
 415 CFU/mL was determined as described earlier.

#### 416 **Reactive oxygen species (ROS)**

417 To elucidate whether growth of anoxic conditioned bacteria was restricted by creation of ROS  
 418 during aerobic respiration, sodium pyruvate (Sigma-Aldrich, USA) was tested as ROS scavenger in

LB plates with 10 mM NO<sub>3</sub><sup>-</sup>. Anoxic and normoxic CFU/mL was determined from 24-hour-old batch cultures and anoxic conditioned 16-day-old batch cultures of *P. aeruginosa*. Only LB plates used for normoxic determination of CFU were casted with 0.3 % sodium pyruvate. Furthermore, CFU/mL was also determined from 16-day-old anoxic conditioned batch cultures of *P. aeruginosa* and a catalase A deficient *P. aeruginosa* ( $\Delta katA$  PAO1) to test the influence of ROS. All experiments were performed in biological triplicates.

### Filter biofilms with other pathogens

To determine if other bacteria behaved in the same way as *P. aeruginosa*, we investigated the effect of anoxic conditioning on a selected group of pathogens (*Staphylococcus epidermidis*, *Staphylococcus aureus* (methicillin susceptible), *Staphylococcus aureus* USA300 JE2 (MRSA), *Escherichia coli* CFT073 and a clinical strain of *Enterococcus faecalis*). We used the filter biofilm method as described earlier. For the methicillin susceptible strain, CFU was determined in the same way as described for the filters with *P. aeruginosa*. For the remaining strains, CFU was determined at day 1 and 9 on LB plates supplemented with 10 mM NO<sub>3</sub><sup>-</sup> +/- O<sub>2</sub>. Furthermore, CFU was determined on LB plates supplemented with 10 mM NO<sub>3</sub><sup>-</sup> and 0.3 % sodium pyruvate to evaluate if the effect of ROS was likewise causing the lack of growth for these pathogens. A minimum of 3 biological replicates was performed and CFU was carried out in the same way as described earlier.

### Direct viable count with LIVE/DEAD staining

LIVE/DEAD staining was applied to estimate the proportion of viable and non-viable cells in 24-hour-old batch cultures and in 16-day-old anoxic conditioned batch cultures of *P. aeruginosa*. The dyes consisted of two fluorescent nucleic acid stains; the green fluorescent stain (live cells) SYTO9 (Invitrogen, USA) and the red fluorescent stain (dead cells) propidium iodide (PI, Sigma-Aldrich, USA). SYTO9 penetrates both intact and damaged membranes while PI only stains damaged cells, thereby creating an opportunity to discriminate between live and dead cells (Li *et al.*, 2014).

Bacterial suspensions were vortexed thoroughly (1 min) and sonicated (5 min degas + 5 minutes sonication) before staining. To stain the cells, 1  $\mu$ L of PI and SYTO9 was added to 1 mL of bacterial suspension and incubated for 15 minutes at room temperature. After staining, the suspensions were filtered through a 0.2  $\mu$ m black Whatman, Nuclepore Trach-Etch Membrane (Sigma-Aldrich, Denmark). Bacteria on filters were visualized with confocal laser scanning microscopy using a Zeiss LSM 710 with a 63 $\times$ /1.4 (numerical aperture) objective (Zeiss, Germany). Fifteen random fields (135 $\mu$ m x 135  $\mu$ m) were examined for each filter. Enumeration of live (green) and dead (red) bacteria were done with the IMARIS software package (Bitplane AG, Schwitterland). Cells that were stained both with PI and SYTO9 were considered non-viable and thus counted as dead cells. Normoxic and anoxic CFU/mL was carried out simultaneously to estimate the proportion of VBNC cells. CFU/mL was determined in the same way as described for liquid batch cultures. Conversion of enumerated viable and dead cells to bacterial counts per milliliter was performed as described by Boulos, Prevost *et al.*, 1999 to compare them with CFU/mL.

#### **Implementation of supplementary plates**

LB and ABTG plates, supplemented with 10 mM NO<sub>3</sub><sup>-</sup>, were tested as a supplementary anoxic growth media at the Department of Clinical Microbiology, Rigshospitalet, Denmark. A total of 135 plates of each were applied to test if NO<sub>3</sub><sup>-</sup> would improve microbiological findings from clinical samples where potential biofilm infections could be suspected. The plates were implemented in the daily routine on tissue and bone samples from sterile sites of the body. Plates were incubated up to 7 days in an anaerobic chamber. Microbiological findings were performed by inspection of plates at day 3, 5 and 7, and confirmation of species was performed with Matrix-assisted laser desorption ionization time-of-flight mass spectrometry (MALDI-TOF MS) on a Microflex LT instrument (Bruker Daltonik GmbH, Germany). Protein profile was obtained by the software FlexControl 3.3

(Bruker Daltonik GmbH), analyzed with FlexAnalysis 3.3 (Bruker Daltonik GmbH). The database used to match spectra was Bruker Taxonomy (7311 MSPs). Results were estimated per patient and compared with findings from conventional methods applied at the Department of Clinical Microbiology, Rigshospitalet. The conventional method consisted of determination of species from solid agar plates under normoxic and anoxic incubation. Normoxic incubation was performed on solid agar plates [‘Blue plates’, a modified Conradi-Drigalski medium containing 10 g/L detergent, 1 g/L  $\text{Na}_2\text{S}_2\text{O}_3 \cdot \text{H}_2\text{O}$ , 0.1 g/L bromothymol blue, 9 g/L lactose, 0.4 g/L glucose, pH 8.0], [Blood agar plates, 5% horse blood, pH 7.4] and in serum bouillons [Basal culture medium supplemented with defibrinated horse blood and horse serum]. Anoxic incubation was performed on solid agar plates [‘Chocolate plates’, a modified Reyn and Bentzon medium containing defibrinated horse blood, ascitic fluid in a broth-agar base consisting of 2.4 % of Danish AKI agar in beefheart broth with 1 % of peptone ("Orthana" special), 0.3% of NaCl and 0.2% of  $\text{Na}_2\text{HPO}_4 \cdot 12\text{H}_2\text{O}$ ] (Møller & Reyn, 1965), [‘anaerobic plates’, prepared as chocolate medium and supplemented with vitamin K and cysteine] and in thioglycollate broths [anaerobic culture medium for sterility]. All media applied at the clinic were produced and delivered by Statens Serum Institut (Copenhagen, Denmark). Microbiological findings by the conventional method were also confirmed with MALDI-TOF MS.

## **Ethics**

A comparison of culture-methods for quality assurance is according to Danish legislation not a health research project, as defined by the ‘Danish Act on Research Ethics Review of Health Research Projects’. Hence, comparison of culture methods on clinical samples could be initiated without approval from The Committees on Health Research Ethics in the Capital Region of Denmark.

## Statistics

To evaluate the difference in bacterial growth between incubation conditions (normoxic and anoxic conditioning), a linear regression was used with the difference between the logarithmically transformed values for normoxic and anoxic colony counts as outcome and with day (categorical) and interaction between day and incubation condition (binary) as explanatory variables in SAS Genmod Procedure. The p-value of the interaction term was used as the p-value for the difference in bacterial growth. Log difference was calculated as  $(\log_{10}[\text{CFU/mL}]_{\text{anoxic}} - \log_{10}[\text{CFU/mL}]_{\text{normoxic}})$ . The mean and standard error of the mean (SEM) were calculated for recovering bacteria and plotted using GraphPad Prism 6.1 (GraphPad Software, La Jolla, USA). Fractions of VBNC bacteria were estimated in growth experiments when difference in plate counts was noted between plating methods. From the ratio between anoxic (CFU -O<sub>2</sub>) and normoxic (CFU +O<sub>2</sub>) colony counts it was possible to calculate the fraction of VBNC bacteria  $[\% \text{ VBNC bacteria} = \frac{(\text{CFU} - \text{O}_2) - (\text{CFU} + \text{O}_2)}{(\text{CFU} - \text{O}_2)} \times 100]$ . Data that were not part of the long-term experiments were instead analyzed with a 1-way ANOVA followed by Tukey's multiple comparison tests, Fisher's exact test or an unpaired t-test. A p-value  $\leq 0.05$  was considered statistically significant. The tests were performed with either Prism 6.1 (GraphPad Software, La Jolla, USA) or SAS v.9.4 (SAS Institute Inc., Cary, NC, USA)

## Funding information

This study was supported by grants from The Lundbeck foundation to TB and by a UC-CARE (University of Copenhagen–Center for Antimicrobial Research) grant to MK. The funders had no role in study design, data collection and interpretation, or the decision to submit the work for publication

## Acknowledgments

515 We would like to thank the laboratory technicians at the Department of Clinical Microbiology,  
516 Rigshospitalet, for helping us with the collection of samples.

517

## 518 **Author contributions**

519 LK performed the majority of the experiments. MK, MS, BFG, SC and KNK also performed  
520 experiments. TB, PØJ, KNK AK, and LK conceived and designed experiments. LK wrote the  
521 manuscript. MA and PØJ performed statistics. All authors analyzed data. All authors contributed to  
522 and corrected the manuscript.

523

## 524 **Conflict of interest**

525 The authors declare that they have no conflict of interest.

# References

- Achermann Y, Goldstein EJ, Coenye T, Shirtliff ME (2014) *Propionibacterium acnes*: from commensal to opportunistic biofilm-associated implant pathogen. *Clin Microbiol Rev* 27: 419-40
- Al-Shuneigat J, Cox SD, Markham JL (2005) Effects of a topical essential oil-containing formulation on biofilm-forming coagulase-negative staphylococci. *Lett Appl Microbiol* 41: 52-5
- Ambalam P, Kondepudi KK, Nilsson I, Wadstrom T, Ljungh A (2012) Bile stimulates cell surface hydrophobicity, Congo red binding and biofilm formation of *Lactobacillus* strains. *FEMS Microbiol Lett* 333: 10-9
- Announ N, Mattei JP, Jaoua S, Fenollar F, Sati H, Chagnaud C, Roudier J, Guis S (2004) Multifocal discitis caused by *Staphylococcus warneri*. *Joint Bone Spine* 71: 240-2
- Binnerup SJ, and J. Sørensen. (1993) Long-term oxidant deficiency in *Pseudomonas aeruginosa* PAO303 results in cells which are non-culturable under aerobic conditions. *FEMS Microbiol Ecol* 13: 79-84
- Bjarnsholt T, Alhede M, Jensen PØ, Nielsen AK, Johansen HK, Homøe P, Høiby N, Givskov M, Kirketerp-Møller K (2015) Antibiofilm Properties of Acetic Acid. *Advances in wound care* 4: 363-372
- Bjarnsholt T, Tolker-Nielsen T, Givskov M, Janssen M, Christensen LH (2009) Detection of bacteria by fluorescence in situ hybridization in culture-negative soft tissue filler lesions. *Dermatologic surgery : official publication for American Society for Dermatologic Surgery [et al]* 35 Suppl 2: 1620-4
- Boulos L, Prevost M, Barbeau B, Coallier J, Desjardins R (1999) LIVE/DEAD BacLight : application of a new rapid staining method for direct enumeration of viable and total bacteria in drinking water. *Journal of microbiological methods* 37: 77-86

549 Brown SA, Palmer KL, Whiteley M (2008) Revisiting the host as a growth medium. *Nature reviews*  
550 *Microbiology* 6: 657-66

551 Burmølle M, Thomsen TR, Fazli M, Dige I, Christensen L, Homøe P, Tvede M, Nyvad B, Tolker-  
552 Nielsen T, Givskov M, Moser C, Kirketerp-Møller K, Johansen HK, Høiby N, Jensen PØ, Sørensen  
553 SJ, Bjarnsholt T (2010) Biofilms in chronic infections - a matter of opportunity - monospecies  
554 biofilms in multispecies infections. *FEMS immunology and medical microbiology* 59: 324-36

555 Cerca F, Trigo G, Correia A, Cerca N, Azeredo J, Vilanova M (2011) SYBR green as a fluorescent  
556 probe to evaluate the biofilm physiological state of *Staphylococcus epidermidis*, using flow  
557 cytometry. *Canadian journal of microbiology* 57: 850-6

558 Costerton JW, Post JC, Ehrlich GD, Hu FZ, Kreft R, Nistico L, Kathju S, Stoodley P, Hall-Stoodley  
559 L, Maale G, James G, Sotereanos N, DeMeo P (2011) New methods for the detection of orthopedic  
560 and other biofilm infections. *FEMS immunology and medical microbiology* 61: 133-40

561 Costerton W, Veeh R, Shirtliff M, Pasmore M, Post C, Ehrlich G (2003) The application of biofilm  
562 science to the study and control of chronic bacterial infections. *J Clin Invest* 112: 1466-77

563 Cui B, Smooker PM, Rouch DA, Deighton MA (2015) Effects of erythromycin on the phenotypic  
564 and genotypic biofilm expression in two clinical *Staphylococcus capitis* subspecies and a functional  
565 analysis of Ica proteins in *S. capitis*. *Journal of medical microbiology*

566 Davey HM (2011) Life, death, and in-between: meanings and methods in microbiology. *Applied*  
567 *and environmental microbiology* 77: 5571-6

568 Donelli G, Vuotto C, Cardines R, Mastrantonio P (2012) Biofilm-growing intestinal anaerobic  
569 bacteria. *FEMS immunology and medical microbiology* 65: 318-25

570 Fenchel T, Finlay B (2008) Oxygen and the spatial structure of microbial communities. *Biol Rev*  
571 *Camb Philos Soc* 83: 553-69



572 Fey PD, Endres JL, Yajjala VK, Widhelm TJ, Boissy RJ, Bose JL, Bayles KW (2013) A genetic  
573 resource for rapid and comprehensive phenotype screening of nonessential *Staphylococcus aureus*  
574 genes. *mBio* 4: e00537-12

575 Frees D, Chastanet A, Qazi S, Sorensen K, Hill P, Msadek T, Ingmer H (2004) Clp ATPases are  
576 required for stress tolerance, intracellular replication and biofilm formation in *Staphylococcus*  
577 *aureus*. *Molecular microbiology* 54: 1445-62

578 Frid P, Tornes K, Nielsen O, Skaug N (2009) Primary chronic osteomyelitis of the jaw--a microbial  
579 investigation using cultivation and DNA analysis: a pilot study. *Oral Surg Oral Med Oral Pathol*  
580 *Oral Radiol Endod* 107: 641-7

581 Fukuda TT, Shoji; Kota, Kohichi; Iwaku, Masaaki; Hoshino, Etsuro (2004) Aerotolerance of  
582 *Peptostreptococcus anaerobius* biofilms. *Microbial Ecology in Health & Disease* Vol. 16 p205

583 Grif K, Heller I, Prodinger WM, Lechleitner K, Lass-Flörl C, Orth D (2012) Improvement of  
584 detection of bacterial pathogens in normally sterile body sites with a focus on orthopedic samples  
585 by use of a commercial 16S rRNA broad-range PCR and sequence analysis. *J Clin Microbiol* 50:  
586 2250-4

587 Hassett DJ, Ma JF, Elkins JG, McDermott TR, Ochsner UA, West SE, Huang CT, Fredericks J,  
588 Burnett S, Stewart PS, McFeters G, Passador L, Iglewski BH (1999) Quorum sensing in  
589 *Pseudomonas aeruginosa* controls expression of catalase and superoxide dismutase genes and  
590 mediates biofilm susceptibility to hydrogen peroxide. *Molecular microbiology* 34: 1082-93

591 Høiby N, Bjarnsholt T, Givskov M, Molin S, Ciofu O (2010) Antibiotic resistance of bacterial  
592 biofilms. *International journal of antimicrobial agents* 35: 322-32

593 Høiby N, Bjarnsholt T, Moser C, Bassi GL, Coenye T, Donelli G, Hall-Stoodley L, Høiby V, Imbert  
594 C, Kirketerp-Møller K, Lebeaux D, Oliver A, Ullmann AJ, Williams C (2015) ESCMID guideline

for the diagnosis and treatment of biofilm infections 2014. *Clinical microbiology and infection : the official publication of the European Society of Clinical Microbiology and Infectious Diseases* 21 Suppl 1: S1-25

James GA, Ge Zhao A, Usui M, Underwood RA, Nguyen H, Beyenal H, deLancey Pulcini E, Agostinho Hunt A, Bernstein HC, Fleckman P, Olerud J, Williamson KS, Franklin MJ, Stewart PS (2016) Microsensor and transcriptomic signatures of oxygen depletion in biofilms associated with chronic wounds. *Wound repair and regeneration : official publication of the Wound Healing Society [and] the European Tissue Repair Society* 24: 373-83

Jensen PØ, Briales A, Brochmann RP, Wang H, Kragh KN, Kolpen M, Hempel C, Bjarnsholt T, Høiby N, Ciofu O (2014) Formation of hydroxyl radicals contributes to the bactericidal activity of ciprofloxacin against *Pseudomonas aeruginosa* biofilms. *Pathogens and disease* 70: 440-3

Jensen PØ, Kolpen M, Kragh KN, Kühl M (2017) Microenvironmental characteristics and physiology of biofilms in chronic infections of CF patients are strongly affected by the host immune response. *APMIS : acta pathologica, microbiologica, et immunologica Scandinavica* 125: 276-288

Kolpen M, Bjarnsholt T, Moser C, Hansen CR, Rickelt LF, Kühl M, Hempel C, Pressler T, Høiby N, Jensen PØ (2014) Nitric oxide production by polymorphonuclear leucocytes in infected cystic fibrosis sputum consumes oxygen. *Clin Exp Immunol* 177: 310-9

Kolpen M, Hansen CR, Bjarnsholt T, Moser C, Christensen LD, van Gennip M, Ciofu O, Mandsberg L, Kharazmi A, Doring G, Givskov M, Høiby N, Jensen PØ (2010) Polymorphonuclear leucocytes consume oxygen in sputum from chronic *Pseudomonas aeruginosa* pneumonia in cystic fibrosis. *Thorax* 65: 57-62

616 Kolpen M, Mousavi N, Sams T, Bjarnsholt T, Ciofu O, Moser C, Kühl M, Høiby N, Jensen PØ  
617 (2016) Reinforcement of the bactericidal effect of ciprofloxacin on *Pseudomonas aeruginosa*  
618 biofilm by hyperbaric oxygen treatment. *International journal of antimicrobial agents* 47: 163-7

619 Kragh KN, Alhede M, Jensen PØ, Moser C, Scheike T, Jacobsen CS, Seier Poulsen S, Eickhardt-  
620 Sørensen SR, Trostrup H, Christoffersen L, Hougen HP, Rickelt LF, Kühl M, Høiby N, Bjarnsholt  
621 T (2014) Polymorphonuclear leukocytes restrict growth of *Pseudomonas aeruginosa* in the lungs of  
622 cystic fibrosis patients. *Infection and immunity* 82: 4477-86

623 Laboratories K (2015) Nitrogen metabolism - Reference pathway. In p Kyoto Encyclopedia of  
624 Genes and Genomes

625 Lentino JR (2004) Infections Associated with Prosthetic Knee and Prosthetic Hip. *Curr Infect Dis*  
626 *Rep* 6: 388-392

627 Li L, Mendis N, Trigui H, Oliver JD, Faucher SP (2014) The importance of the viable but non-  
628 culturable state in human bacterial pathogens. *Frontiers in microbiology* 5: 258

629 Mascher F, Hase C, Moenne-Loccoz Y, Defago G (2000) The viable-but-nonculturable state  
630 induced by abiotic stress in the biocontrol agent *Pseudomonas fluorescens* CHA0 does not promote  
631 strain persistence in soil. *Applied and environmental microbiology* 66: 1662-7

632 Meyer T, Franke G, Polywka SK, Lutgehetmann M, Gbadamosi J, Magnus T, Aepfelbacher M  
633 (2014) Improved detection of bacterial central nervous system infections by use of a broad-range  
634 PCR assay. *J Clin Microbiol* 52: 1751-3

635 Müller D, Gabriel J (1999) Bacterial degradation of the herbicide bromoxynil by *Agrobacterium*  
636 *radiobacter* in biofilm. *Folia Microbiol (Praha)* 44: 377-9

637 Møller V, Reyn A (1965) A new solid medium for the isolation of *Neisseria Gonorrhoeae*. *Bull*  
638 *World Health Organ* 32: 471-6

639 Noor R (2015) Mechanism to control the cell lysis and the cell survival strategy in stationary phase  
640 under heat stress. *SpringerPlus* 4: 599

641 Oliver JD (2010) Recent findings on the viable but nonculturable state in pathogenic bacteria.  
642 *FEMS microbiology reviews* 34: 415-25

643 Pasquaroli S, Zandri G, Vignaroli C, Vuotto C, Donelli G, Biavasco F (2013) Antibiotic pressure  
644 can induce the viable but non-culturable state in *Staphylococcus aureus* growing in biofilms. *The*  
645 *Journal of antimicrobial chemotherapy* 68: 1812-7

646 Perez-Jorge C, Cordero J, Marin M, Esteban J (2012) Prosthetic joint infection caused by  
647 *Helcococcus kunzii*. *J Clin Microbiol* 50: 528-30

648 Pinto D, Santos MA, Chambel L (2015) Thirty years of viable but nonculturable state research:  
649 unsolved molecular mechanisms. *Critical reviews in microbiology* 41: 61-76

650 Ramamurthy T, Ghosh A, Pazhani GP, Shinoda S (2014) Current Perspectives on Viable but Non-  
651 Culturable (VBNC) Pathogenic Bacteria. *Frontiers in public health* 2: 103

652 Rodby RA, Glick EJ (1991) *Agrobacterium radiobacter* peritonitis in two patients maintained on  
653 chronic peritoneal dialysis. *Am J Kidney Dis* 18: 402-5

654 Rogers KL, Fey PD, Rupp ME (2009) Coagulase-negative staphylococcal infections. *Infect Dis*  
655 *Clin North Am* 23: 73-98

656 Seng P, Bayle S, Alliez A, Romain F, Casanova D, Stein A (2015) The microbial epidemiology of  
657 breast implant infections in a regional referral centre for plastic and reconstructive surgery in the  
658 south of France. *Int J Infect Dis* 35: 62-66

659 Stanger KM, Albert F, Kneser U, Bogdan C, Horch R (2013) Management of chronic osteomyelitis  
660 of the tibia with life-threatening complications under negative pressure wound therapy and isolation  
661 of *Helcococcus kunzii*. *Int Wound J*

662 Stewart EJ (2012) Growing unculturable bacteria. *Journal of bacteriology* 194: 4151-60

663 S nderholm M, Koren K, Wangpraseurt D, Jensen P , Kolpen M, Kragh KN, Bjarnsholt T, K hl  
664 M (2018) Tools for studying growth patterns and chemical dynamics of aggregated *Pseudomonas*  
665 *aeruginosa* exposed to different electron acceptors in an alginate bead model. *NPJ biofilms and*  
666 *microbiomes* 4: 3

667 S nderholm M, Kragh KN, Koren K, Jakobsen TH, Darch SE, Alhede M, Jensen P , Whiteley M,  
668 K hl M, Bjarnsholt T (2017) *Pseudomonas aeruginosa* Aggregate Formation in an Alginate Bead  
669 Model System Exhibits In Vivo-Like Characteristics. *Applied and environmental microbiology* 83

670 Trunk K, Benkert B, Quack N, Munch R, Scheer M, Garbe J, Jansch L, Trost M, Wehland J, Buer J,  
671 Jahn M, Schobert M, Jahn D (2010) Anaerobic adaptation in *Pseudomonas aeruginosa*: definition  
672 of the Anr and Dnr regulons. *Environmental microbiology* 12: 1719-33

673 Walters MC, 3rd, Roe F, Bugnicourt A, Franklin MJ, Stewart PS (2003) Contributions of antibiotic  
674 penetration, oxygen limitation, and low metabolic activity to tolerance of *Pseudomonas aeruginosa*  
675 biofilms to ciprofloxacin and tobramycin. *Antimicrobial agents and chemotherapy* 47: 317-23

676 Wang X, Perez E, Liu R, Yan LJ, Mallet RT, Yang SH (2007) Pyruvate protects mitochondria from  
677 oxidative stress in human neuroblastoma SK-N-SH cells. *Brain research* 1132: 1-9

678 Weckwerth PH, de Mattias Franco AT, de Magalhaes Lopes CA, Santos FD, Weckwerth AC,  
679 Vivan RR, Duarte MA (2014) Bacterial pathogens related to chronic suppurative otitis media in  
680 individuals with cleft palate: bacteriological culture and polymerase chain reaction. *Cleft Palate*  
681 *Craniofac J* 51: 145-53

682 Welch RA, Burland V, Plunkett G, 3rd, Redford P, Roesch P, Rasko D, Buckles EL, Liou SR,  
683 Boutin A, Hackett J, Stroud D, Mayhew GF, Rose DJ, Zhou S, Schwartz DC, Perna NT, Mobley  
684 HL, Donnenberg MS, Blattner FR (2002) Extensive mosaic structure revealed by the complete  
685 genome sequence of uropathogenic *Escherichia coli*. *Proceedings of the National Academy of*  
686 *Sciences of the United States of America* 99: 17020-4

687 Worlitzsch D, Tarran R, Ulrich M, Schwab U, Cekici A, Meyer KC, Birrer P, Bellon G, Berger J,  
688 Weiss T, Botzenhart K, Yankaskas JR, Randell S, Boucher RC, Döring G (2002) Effects of reduced  
689 mucus oxygen concentration in airway *Pseudomonas* infections of cystic fibrosis patients. *J Clin*  
690 *Invest* 109: 317-25

691 Yu WL, Wang DY, Lin CW (1997) *Agrobacterium radiobacter* bacteremia in a patient with chronic  
692 obstructive pulmonary disease. *J Formos Med Assoc* 96: 664-6

693

694

695

696

697

698

699

700

## Figure legends

### Figure 1 – An oxygen intolerant subpopulation of *Pseudomonas aeruginosa* (PAO1) was induced in the bead biofilm model

- A) Normoxic and anoxic CFU/mL of PAO1 over 21 days from the beads. Symbols with error bars indicate the mean  $\pm$  SEM ( $n = 4$ ).  $+\text{NO}_3^-$  refers to the addition of 10 mM  $\text{KNO}_3$  to LB agar plates.
- B) Normoxic and anoxic CFU/mL of PAO1 over 21 days from the suspension surrounding the beads. Symbols with error bars indicate the mean  $\pm$  SEM ( $n = 4$ ).  $+\text{NO}_3^-$  refers to the addition of 10 mM  $\text{KNO}_3$  to LB agar plates.
- C) The log difference was calculated as the difference in mean log CFU/mL between plating methods from the suspension and the beads, respectively. The log difference was significantly higher ( $p = 0.003$ , linear regression) in the beads than the surrounding suspension. Symbols with error bars indicate the mean + confidence intervals.

### Figure 2 – An oxygen intolerant subpopulation of *Pseudomonas aeruginosa* (PAO1) was induced in the filter biofilm model

- A) Normoxic and anoxic CFU/mL of PAO1 over 17 days from anoxically conditioned filters. Symbols with error bars indicate the mean  $\pm$  SEM ( $n = 4$ ).  $+\text{NO}_3^-$  refers to the addition of 10 mM  $\text{KNO}_3$  to LB agar plates.
- B) Normoxic and anoxic CFU/mL of PAO1 over 17 days from normoxically conditioned filters. Symbols with error bars indicate the mean  $\pm$  SEM ( $n = 4$ ).  $+\text{NO}_3^-$  refers to the addition of 10 mM  $\text{KNO}_3$  to LB agar plates.
- C) The log difference was calculated as the difference in mean log CFU/mL between plating methods from the normoxic and anoxic conditioned filters, respectively. The log difference was

significantly higher ( $p = 0.01$ , linear regression) in the anoxic conditioned filters than the normoxic conditioned. Symbols with error bars indicate the mean + confidence intervals.

**Figure 3 – An oxygen intolerant subpopulation of *Pseudomonas aeruginosa* (PAO1) was induced in the planktonic batch cultures**

A) Normoxic and anoxic CFU/mL of PAO1 over 28 days from anoxic conditioned batch cultures.

Symbols with error bars indicate the mean  $\pm$  SEM ( $n = 4$ ).  $+NO_3^-$  refers to the addition of 10 mM  $KNO_3$  to LB agar plates.

B) Normoxic and anoxic CFU/mL of PAO1 over 28 days from normoxic conditioned batch cultures. Symbols with error bars indicate the mean  $\pm$  SEM ( $n = 4$ ).  $+NO_3^-$  refers to the addition of 10 mM  $KNO_3$  to LB agar plates.

C) The log difference was calculated as the difference in mean log CFU/mL between plating methods from the normoxic and anoxically conditioned batch cultures, respectively. The log difference was significantly higher ( $p < 0.0001$ , linear regression) in the anoxically conditioned batch cultures than the normoxically conditioned. Symbols with error bars indicate the mean + confidence intervals.

**Figure 4 – An oxygen intolerant subpopulation of *Pseudomonas aeruginosa* (PAO1) was induced in colonies**

A) Normoxic and anoxic CFU/mL of PAO1 over 20 days from anoxically conditioned colonies.

Symbols with error bars indicate the mean  $\pm$  SEM ( $n = 3$ ).  $+NO_3^-$  refers to the addition of 10 mM  $KNO_3$  to LB agar plates.



B) Normoxic and anoxic CFU/mL of PAO1 over 20 days from normoxic conditioned colonies.

Symbols with error bars indicate the mean  $\pm$  SEM (n = 3). +NO<sub>3</sub><sup>-</sup> refers to the addition of 10 mM KNO<sub>3</sub> to LB agar plates.

C) The log difference was calculated as the difference in mean log CFU/mL between plating

methods from the normoxic and anoxically conditioned colonies, respectively. The log

difference was significantly higher (p < 0.0001, linear regression) in the anoxic conditioned

colonies than the normoxic conditioned. Symbols with error bars indicate the mean + confidence intervals.

**Figure 5 – Reactive oxygen species partly explains creation of the VBNC subpopulation of *Pseudomonas aeruginosa* (PAO1)**

A) Normoxic and anoxic determination of CFU/mL were determined for 16-day-old anoxically conditioned batch cultures of PAO1. Normoxic CFU was determined with and without addition of 0.3% sodium pyruvate. Symbols with error bars indicate the mean  $\pm$  SEM (n = 3). +NO<sub>3</sub><sup>-</sup> refers to the addition of 10 mM KNO<sub>3</sub> to LB agar plates. Significant difference between normoxic incubation +/- 0.3 % sodium pyruvate (p = 0.01, one-way ANOVA test). Significant difference (p = 0.0075, one-way ANOVA test) between anoxic and normoxic incubation + 0.3% sodium pyruvate.

B) Normoxic and anoxic determination of CFU/mL were determined for 24-hour-old batch cultures of PAO1. Normoxic CFU was determined with and without addition of 0.3% sodium pyruvate.

Symbols with error bars indicate the mean  $\pm$  SEM (n = 3). +NO<sub>3</sub><sup>-</sup> refers to the addition of 10 mM KNO<sub>3</sub> to LB agar plates. No difference between types of incubation (one-way ANOVA test).

C) Normoxic and anoxic determination of CFU/mL were determined for 16-day-old anoxically

conditioned batch cultures of PAO1 and  $\Delta katA$  PAO1. Symbols with error bars indicate the mean

± SEM (n = 3). +NO<sub>3</sub><sup>-</sup> refers to the addition of 10 mM KNO<sub>3</sub> to LB agar plates. Significant difference between anoxic and normoxic incubation with both PAO1 and *ΔkatA* PAO1 (p = 0.001 and p < 0.0001, respectively, one-way ANOVA test)

**Figure 6 - An oxygen intolerant subpopulation of *Staphylococcus aureus* (methicillin susceptible) was induced in the filter biofilm model**

A) Normoxic and anoxic CFU/mL of *Staphylococcus aureus* over 17 days from anoxic conditioned filters. Symbols with error bars indicate the mean ± SEM (n = 4). +NO<sub>3</sub><sup>-</sup> refers to the addition of 10 mM KNO<sub>3</sub> to LB agar plates.

B) Normoxic and anoxic CFU/mL of *S. aureus* over 17 days from normoxic conditioned filters. Symbols with error bars indicate the mean ± SEM (n = 4). +NO<sub>3</sub><sup>-</sup> refers to the addition of 10 mM KNO<sub>3</sub> to LB agar plates.

C) The log difference was calculated as the difference in mean log CFU/mL between plating methods from the normoxic and anoxically conditioned filters, respectively. The log difference was significantly higher (p < 0.001, linear regression) in the anoxically conditioned filters than the normoxic conditioned. Symbols with error bars indicate the mean + confidence intervals.

## Tables and their legends

### Table 1 – Bacterial finding in a clinical setting on LB plates supplemented with 10 mM KNO<sub>3</sub><sup>-</sup>

Bacteria exclusively detected on lysogeny broth (LB) agar plates supplemented with 10 mM KNO<sub>3</sub><sup>-</sup> (n = 19 in 16 patients). In 5 cases (5 patients) growth was only detected with LB + NO<sub>3</sub><sup>-</sup>. Bacteria marked with \* were not possible to identify with MALDI-TOF MS to the genus or species level. NA means not applicable, this is due to the failure of proper identification. Ability to reduce nitrate is elucidated from the Kyoto Encyclopedia of Genes and Genomes (KEGG) database under the nitrogen metabolism - reference pathway (Laboratories, 2015). +/- refers to the ability of the organism to perform or not perform either nitrate reductase, biofilm or be associated with chronic infections.

| Bacteria found exclusively on LB supplemented with NO <sub>3</sub> <sup>-</sup> . | Numbers detected | Growth only detected with LB + NO <sub>3</sub> <sup>-</sup> . | Nitrate reductase | Biofilm formation | Possible infection (chronic) | Literature                                                                        |
|-----------------------------------------------------------------------------------|------------------|---------------------------------------------------------------|-------------------|-------------------|------------------------------|-----------------------------------------------------------------------------------|
| <i>Staphylococcus epidermidis</i>                                                 | 4                | 2                                                             | +                 | +                 | +                            | (Lentino, 2004, Rogers <i>et al.</i> , 2009)                                      |
| <i>Rhizobacterium</i><br>( <i>Agrobacterium</i> ) <i>radiobacter</i>              | 1                | -                                                             | +                 | +                 | +                            | (Müller & Gabriel, 1999, Rodby & Glick, 1991, Yu, Wang <i>et al.</i> , 1997)      |
| <i>Helcococcus kunzii</i>                                                         | 1                | -                                                             | -                 | +                 | +                            | (Perez-Jorge, Cordero <i>et al.</i> , 2012, Stanger, Albert <i>et al.</i> , 2013) |
| <i>Staphylococcus capitis</i>                                                     | 1                | -                                                             | +                 | +                 | +                            | (Cui, Smooker <i>et al.</i> , 2015, Frid, Tornes <i>et al.</i> , 2009)            |
| <i>Propionibacterium acnes</i>                                                    | 2                | -                                                             | +                 | +                 | +                            | (Achermann, Goldstein <i>et al.</i> , 2014, Frid <i>et al.</i> , 2009)            |
| <i>Finegoldia magna</i>                                                           | 4                | -                                                             | +                 | +                 | +                            | (Donelli, Vuotto <i>et al.</i> , 2012, Seng, Bayle <i>et al.</i> , 2015)          |
| <i>Staphylococcus warneri</i>                                                     | 2                | 2                                                             | +                 | +                 | +                            | (Al-Shuneigat, Cox <i>et al.</i> , 2005, Announ, Mattei <i>et al.</i> , 2004)     |
| <i>Peptostreptococcus anaerobius</i>                                              | 1                | -                                                             | +                 | +                 | +                            | (Fukuda, 2004, Weckwerth, de Mattias Franco <i>et al.</i> , 2014)                 |

|                                |   |   |    |    |    |                                           |
|--------------------------------|---|---|----|----|----|-------------------------------------------|
| <i>Lactobacillus rhamnosus</i> | 1 | - | +  | +  | +  | (Ambalam, Kondepudi <i>et al.</i> , 2012) |
| <i>Propionebacterium sp.*</i>  | 1 | - | NA | NA | NA | -                                         |
| <i>Cocci*</i>                  | 1 | 1 | NA | NA | NA | -                                         |

799

800

801 **Appendix figure legends**

802 **Appendix Figure S1 – Percentage distribution of VBNC bacteria over time in different growth**  
803 **models**

804 A) The percentage of VBNC *Pseudomonas aeruginosa* after anoxic conditioning in the bead biofilm  
805 model.

806 B) The percentage of VBNC *Pseudomonas aeruginosa* after anoxic conditioning in the filter  
807 biofilm model.

808 C) The percentage of VBNC *Pseudomonas aeruginosa* after anoxic conditioning in batch cultures.

809 D) The percentage of VBNC *Pseudomonas aeruginosa* after anoxic conditioning as colonies.

810 E) The percentage of VBNC *Staphylococcus aureus* after anoxic conditioning in the filter biofilm  
811 model.

812

813 **Appendix Figure S2 – Direct viable counting reveals a larger viable but non-culturable**  
814 **population of *Pseudomonas aeruginosa* (PAO1) after anoxic conditioning.**

815 A) Bacterial counts per milliliter were determined with plate counting and direct viable counting  
816 from 24-hour-old batch cultures of PAO1. Bacteria were stained with LIVE/DEAD staining to  
817 estimate the proportion of viable (“live”) and non-viable (“dead”) cells. Symbols with error bars  
818 indicate the mean  $\pm$  SEM (n = 3). +NO<sub>3</sub><sup>-</sup> refers to the addition of 10 mM KNO<sub>3</sub> to LB agar  
819 plates.

820 B) Bacterial counts per milliliter were determined with plate counting and direct viable counting  
821 from 16-day-old anoxically conditioned batch cultures of PAO1. Bacteria were stained with  
822 LIVE/DEAD staining to estimate the proportion of viable (“live”) and non-viable (“dead”) cells.  
823 Symbols with error bars indicate the mean  $\pm$  SEM (n = 3). +NO<sub>3</sub><sup>-</sup> refers to the addition of 10 mM  
824 KNO<sub>3</sub> to LB agar plates. There was significantly more bacterial counts (p = 0.0497, one-way

ANOVA test) when applying direct viable counting in comparison to normoxic grown colony forming units per milliliter (CFU/mL). CFU/mL was significantly higher ( $p = 0.001$ , one-way ANOVA test) when PAO1 was grown under anoxic conditions in comparison to normoxic conditions

**Appendix Figure S3 - An oxygen intolerant subpopulation of *Staphylococcus aureus* (MRSA) and *Staphylococcus epidermidis* was induced in the filter biofilm model.**

A) Normoxic and anoxic (+/- sodium pyruvate) determination of CFU/mL were determined for 1 and 9 days old anoxically conditioned filters with *Staphylococcus aureus* (MRSA). Symbols with error bars indicate the mean  $\pm$  SEM ( $n = 3$ ). +NO<sub>3</sub><sup>-</sup> refers to the addition of 10 mM KNO<sub>3</sub> to LB agar plates. Significant difference between anoxic and normoxic incubation with and without addition of sodium pyruvate at day 9 ( $p = 0.01$  and  $p < 0.01$ , respectively, one-way ANOVA test)

B) Normoxic and anoxic (+/- sodium pyruvate) determination of CFU/mL were determined for 1 and 9 days old normoxic conditioned filters with *Staphylococcus aureus* (MRSA). Symbols with error bars indicate the mean  $\pm$  SEM ( $n = 3$ ). +NO<sub>3</sub><sup>-</sup> refers to the addition of 10 mM KNO<sub>3</sub> to LB agar plates. No difference between types of incubation (one-way ANOVA test).

C) Normoxic and anoxic (+/- sodium pyruvate) determination of CFU/mL were determined for 1 and 9 days old anoxically conditioned filters with *Staphylococcus epidermidis*. Symbols with error bars indicate the mean  $\pm$  SEM ( $n = 3$ ). +NO<sub>3</sub><sup>-</sup> refers to the addition of 10 mM KNO<sub>3</sub> to LB agar plates. Significant difference between anoxic and normoxic incubation at day 9 ( $p = 0.003$ , one-way ANOVA test)

D) Normoxic and anoxic (+/- sodium pyruvate) determination of CFU/mL were determined for 1 and 9 days old normoxic conditioned filters with *Staphylococcus epidermidis*. Symbols with

error bars indicate the mean  $\pm$  SEM (n = 3). +NO<sub>3</sub><sup>-</sup> refers to the addition of 10 mM KNO<sub>3</sub> to LB agar plates. No difference between types of incubation (one-way ANOVA test).

**Appendix Figure S4 – Anoxic conditioning did not affect *Escherichia coli* or *Enterococcus faecalis* during growth in the filter biofilm model.**

A) Normoxic and anoxic (+/- sodium pyruvate) determination of CFU/mL were determined for 1 and 9 days old anoxically conditioned filters with *E. coli*. Symbols with error bars indicate the mean  $\pm$  SEM (n = 3). +NO<sub>3</sub><sup>-</sup> refers to the addition of 10 mM KNO<sub>3</sub> to LB agar plates. No difference between types of incubation (one-way ANOVA test).

B) Normoxic and anoxic (+/- sodium pyruvate) determination of CFU/mL were determined for 1 and 9 days old normoxic conditioned filters with *E. coli*. Symbols with error bars indicate the mean  $\pm$  SEM (n = 3). +NO<sub>3</sub><sup>-</sup> refers to the addition of 10 mM KNO<sub>3</sub> to LB agar plates. No difference between types of incubation (one-way ANOVA test).

C) Normoxic and anoxic (+/- sodium pyruvate) determination of CFU/mL were determined for 1 and 9 days old anoxically conditioned filters with *E. faecalis*. Symbols with error bars indicate the mean  $\pm$  SEM (n = 3). +NO<sub>3</sub><sup>-</sup> refers to the addition of 10 mM KNO<sub>3</sub> to LB agar plates. No difference between types of incubation (one-way ANOVA test).

D) Normoxic and anoxic (+/- sodium pyruvate) determination of CFU/mL were determined for 1 and 9 days old normoxically conditioned filters with *E. faecalis*. Symbols with error bars indicate the mean  $\pm$  SEM (n = 3). +NO<sub>3</sub><sup>-</sup> refers to the addition of 10 mM KNO<sub>3</sub> to LB agar plates. No difference between types of incubation (one-way ANOVA test).

**Appendix Figure S5 – Implementation of a supplementary diagnostic media at the Department of Clinical Microbiology, Rigshospitalet.**

873 A) Percentage distribution of culture positive findings in patient samples between the conventional  
 874 method, LB agar plates and ABTG plates supplemented with 10 mM  $\text{NO}_3^-$ . LB plates  
 875 supplemented with 10 mM  $\text{NO}_3^-$  and the conventional method found significantly more positive  
 876 samples in comparison to ABTG plates supplemented with 10 mM  $\text{NO}_3^-$  ( $p = 0.0003$  and  $p =$   
 877  $0.0001$ , respectively, Fisher's exact test).

878 B) Number of patients with culture positive findings by conventional method and on anoxic LB  
 879 plates supplemented with 10 mM  $\text{NO}_3^-$ .

880



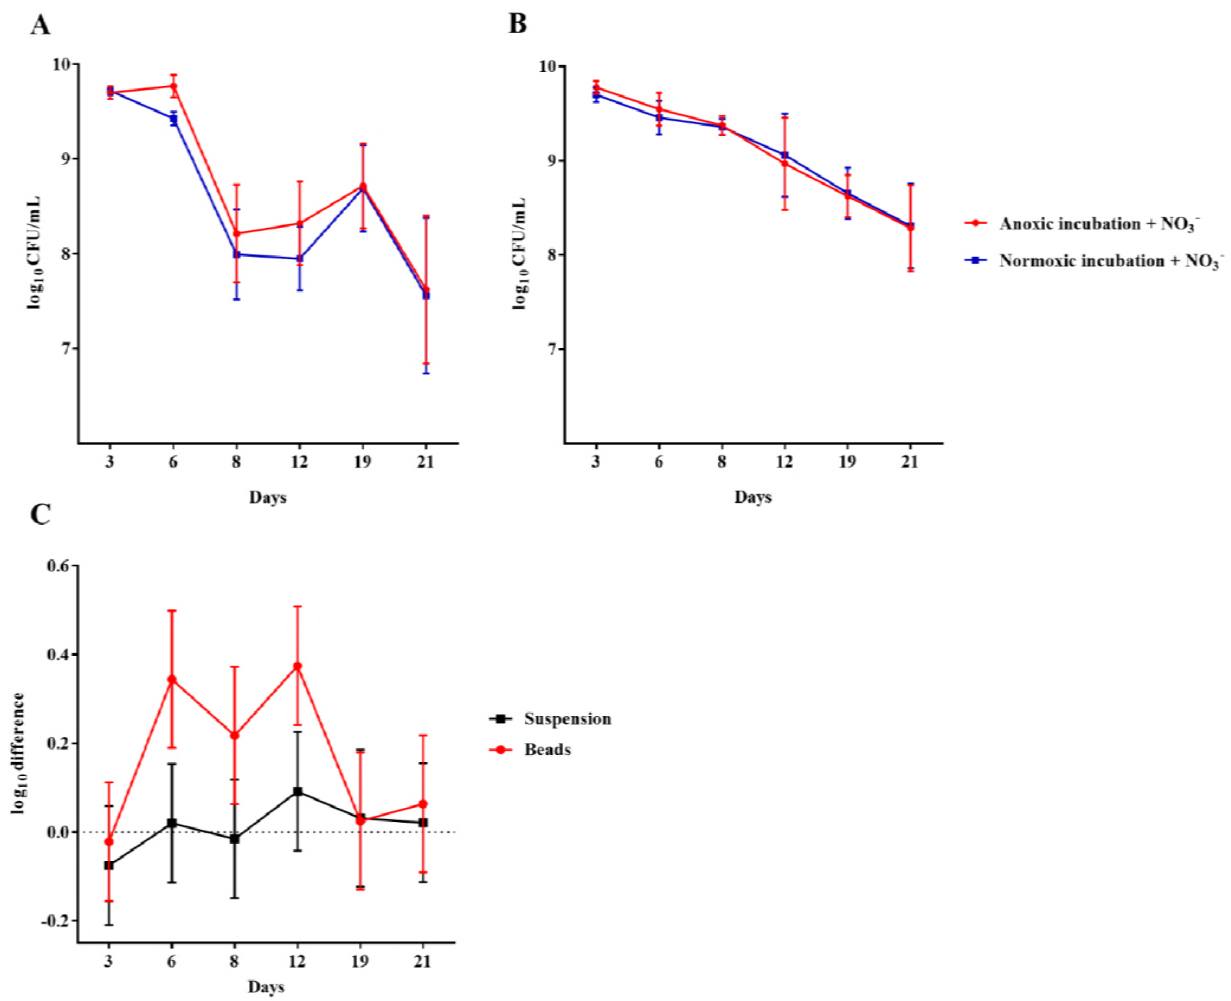

Figure 1 – An oxygen intolerant subpopulation of *Pseudomonas aeruginosa* (PAO1) was induced in the bead biofilm model

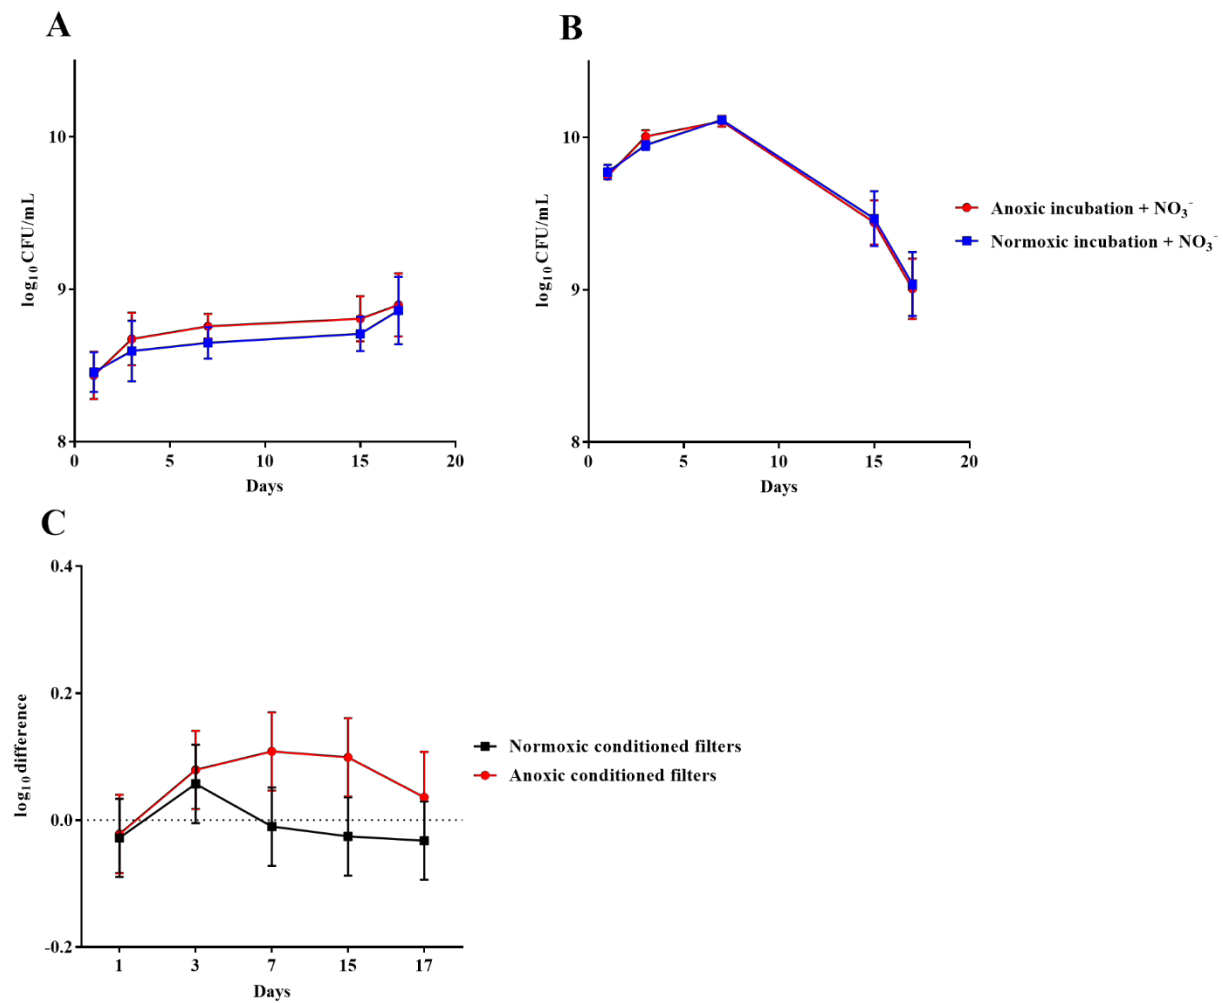

Figure 2 – An oxygen intolerant subpopulation of *Pseudomonas aeruginosa* (PAO1) was induced in the filter biofilm model

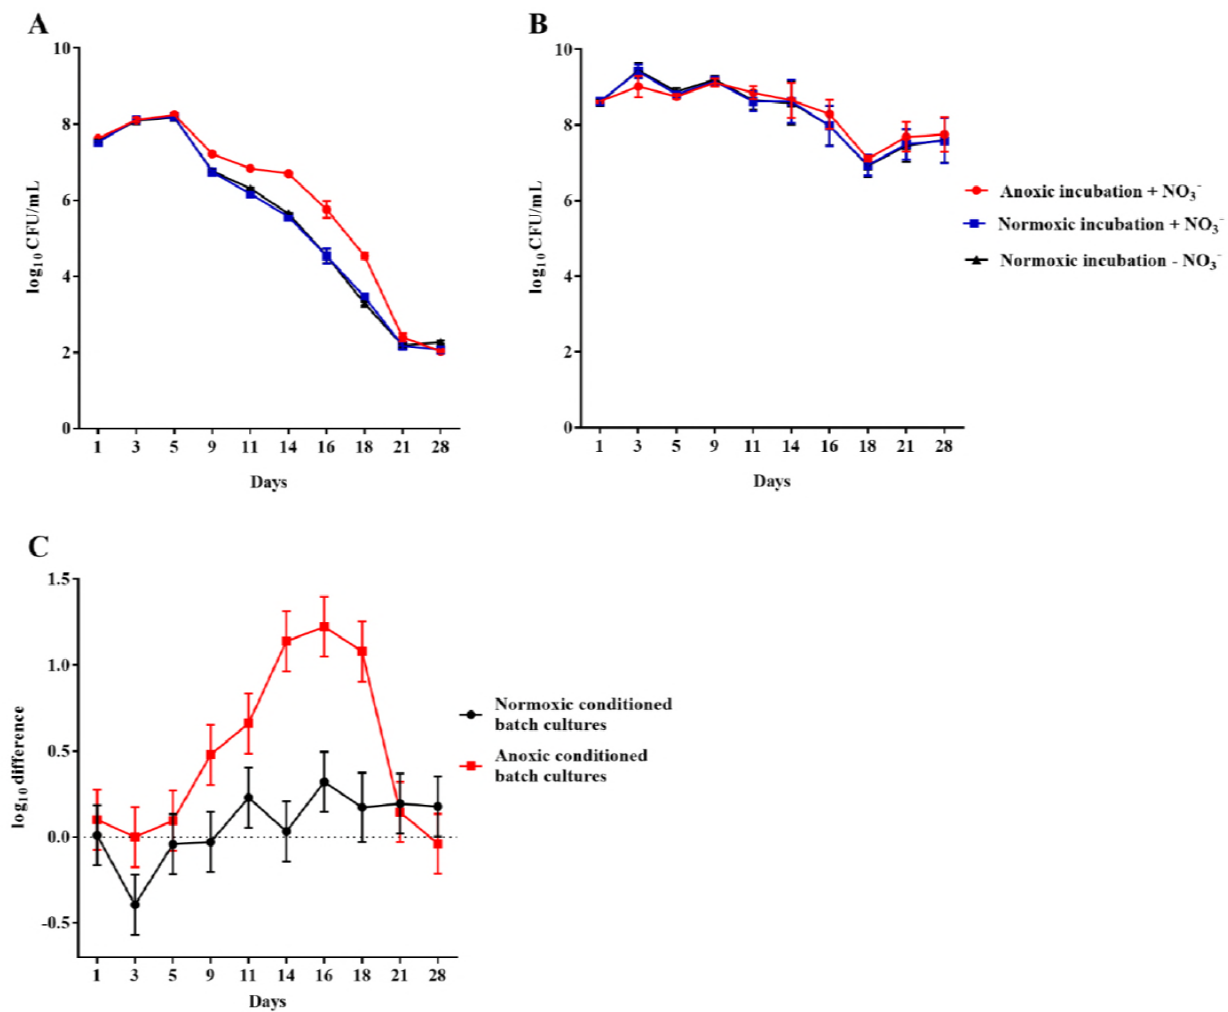

**Figure 3 – An oxygen intolerant subpopulation of *Pseudomonas aeruginosa* (PAO1) was induced in the planktonic batch cultures**

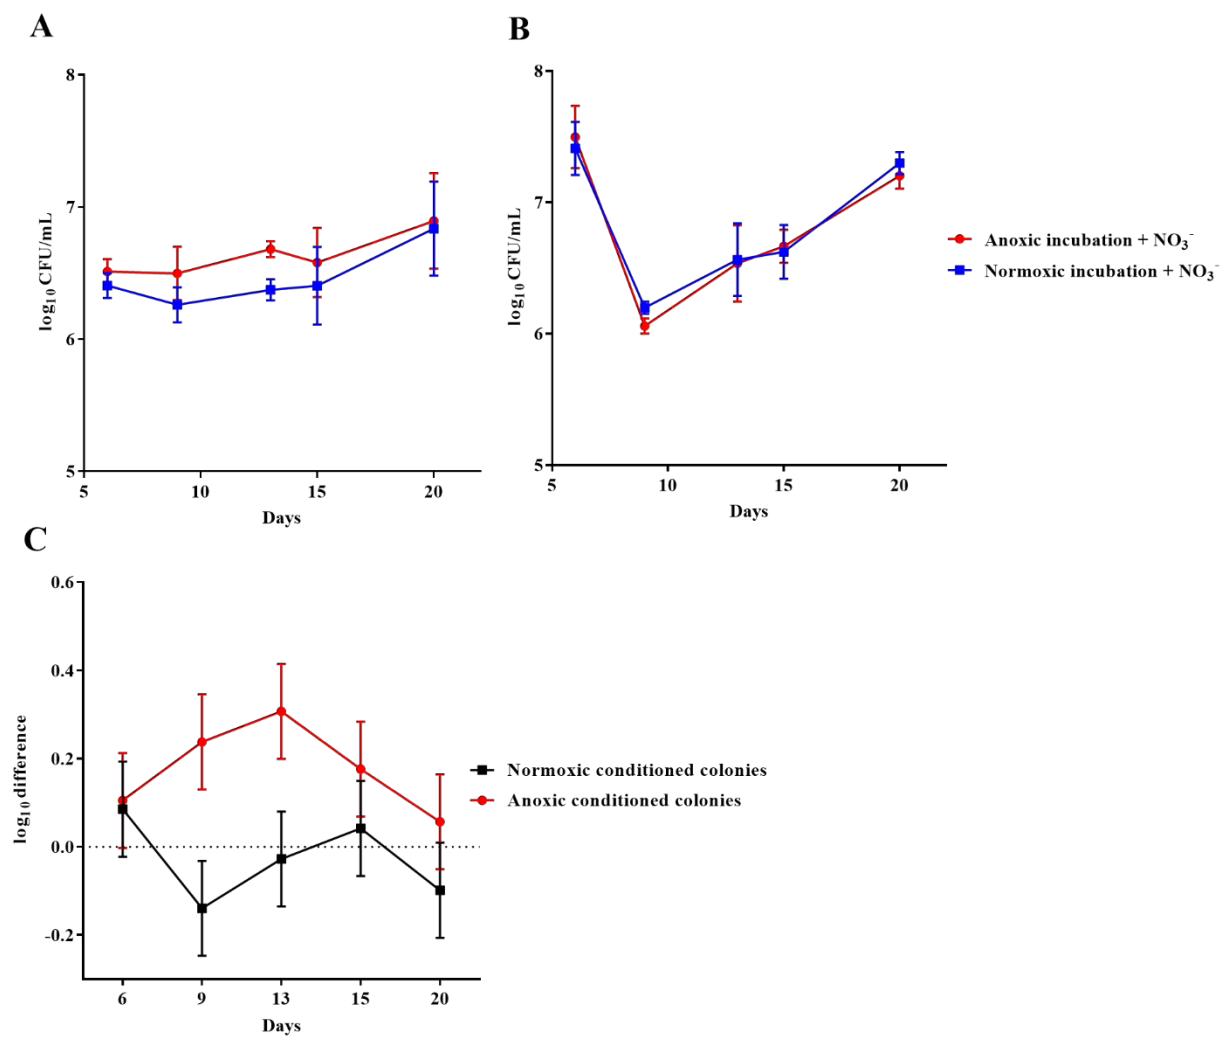

**Figure 4 – An oxygen intolerant subpopulation of *Pseudomonas aeruginosa* (PAO1) was induced in colonies**

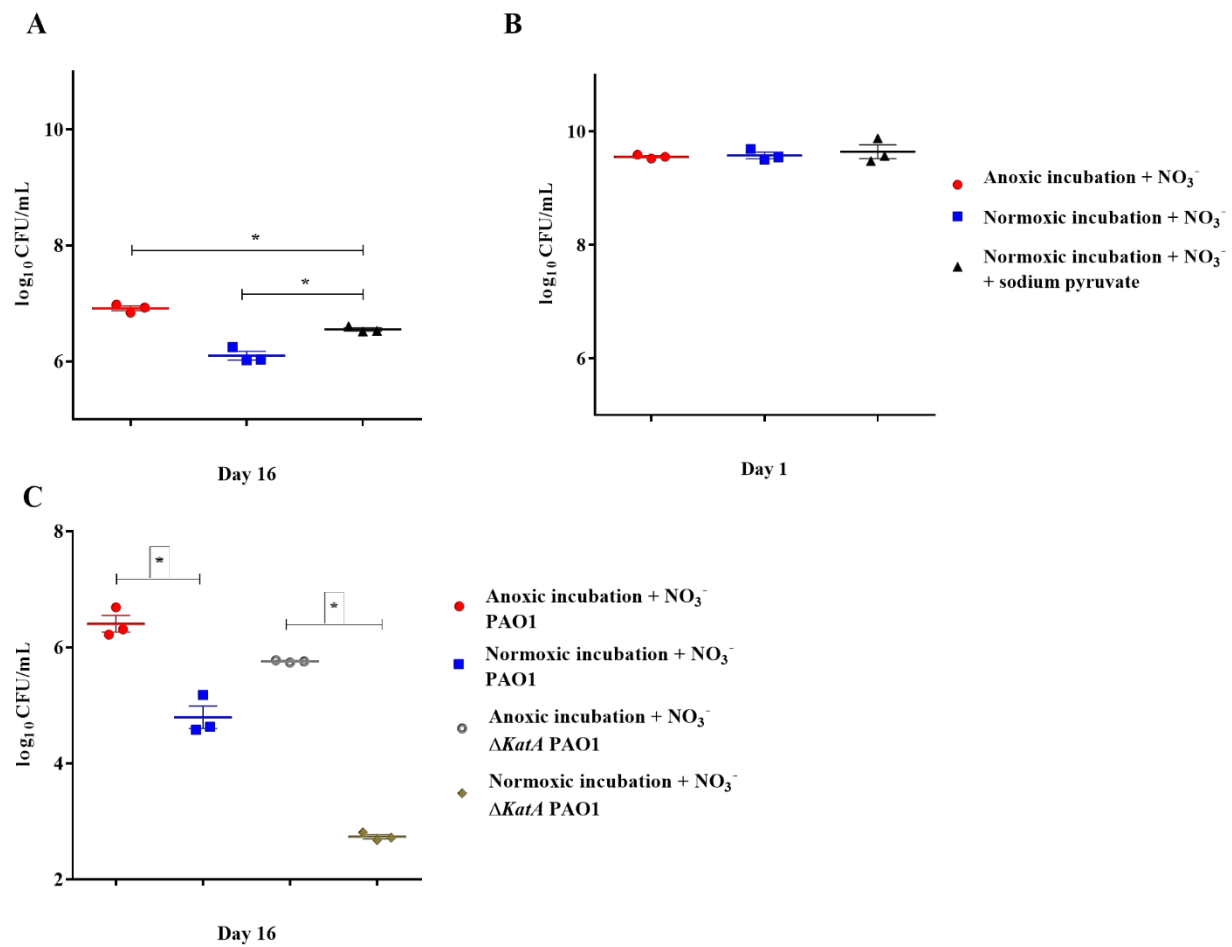

**Figure 5 – Reactive oxygen species partly explains creation of the VBNC subpopulation of *Pseudomonas aeruginosa* (PAO1)**

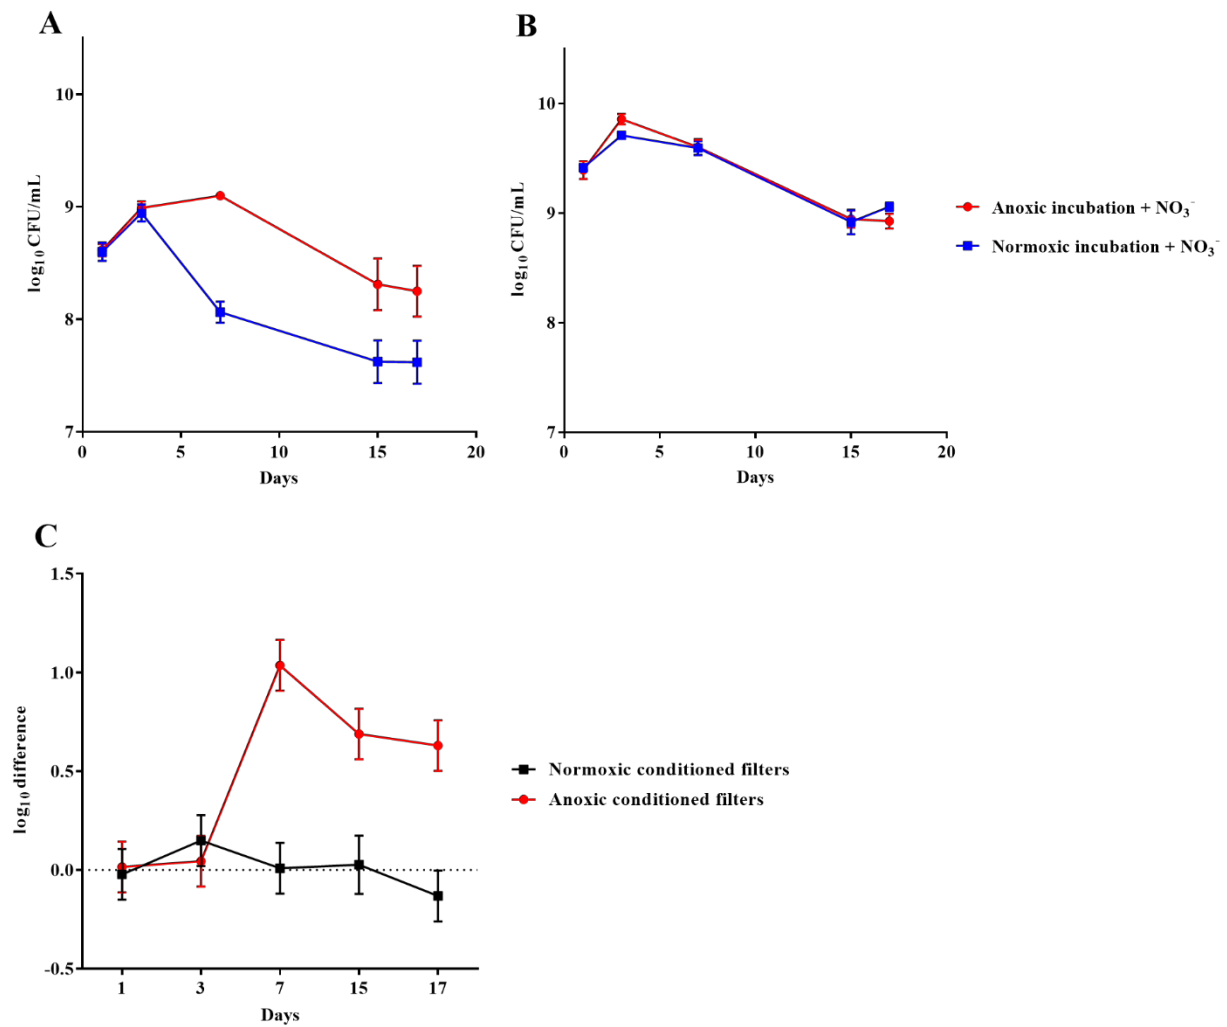

**Figure 6 - An oxygen intolerant subpopulation of *Staphylococcus aureus* (methicillin susceptible) was induced in the filter biofilm model**

## Appendix figure legends

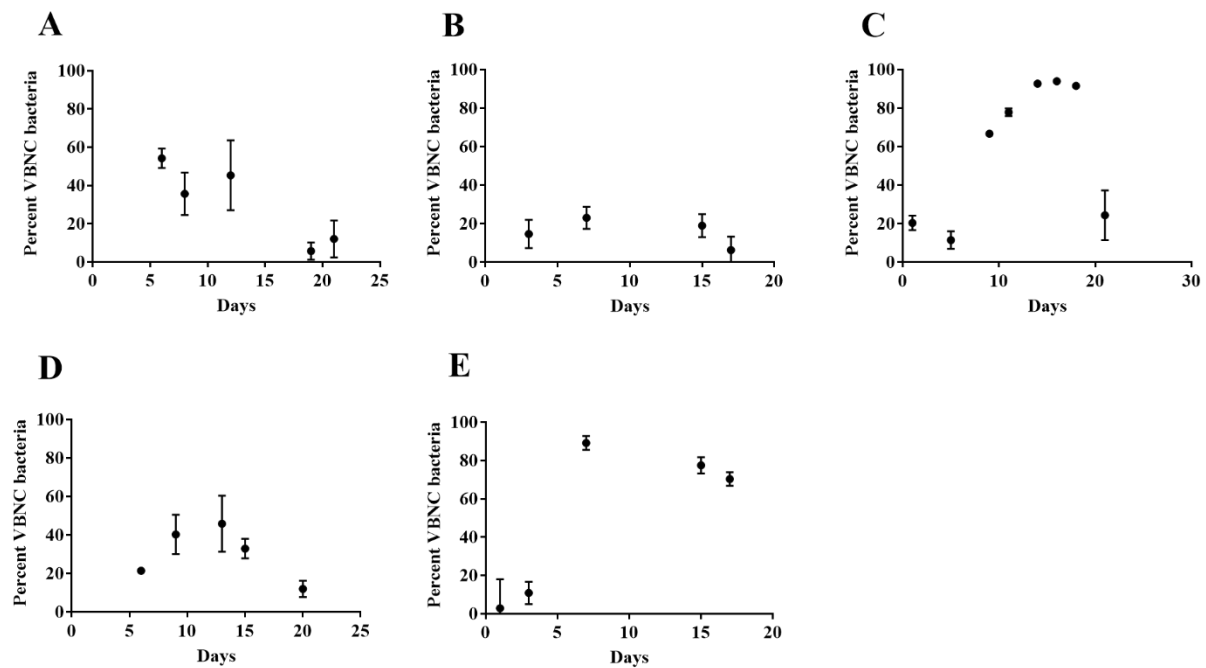

Appendix Figure S1 – Percentage distribution of VBNC bacteria over time in different growth models

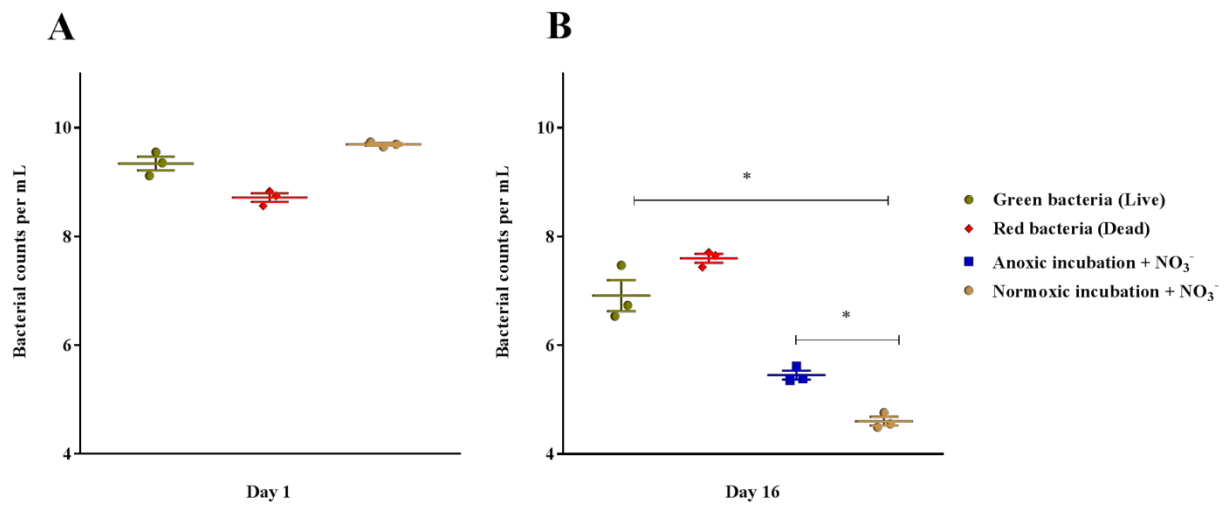

**Appendix Figure S2 – Direct viable counting reveals a larger viable but non-culturable population of *Pseudomonas aeruginosa* (PAO1) after anoxic conditioning.**



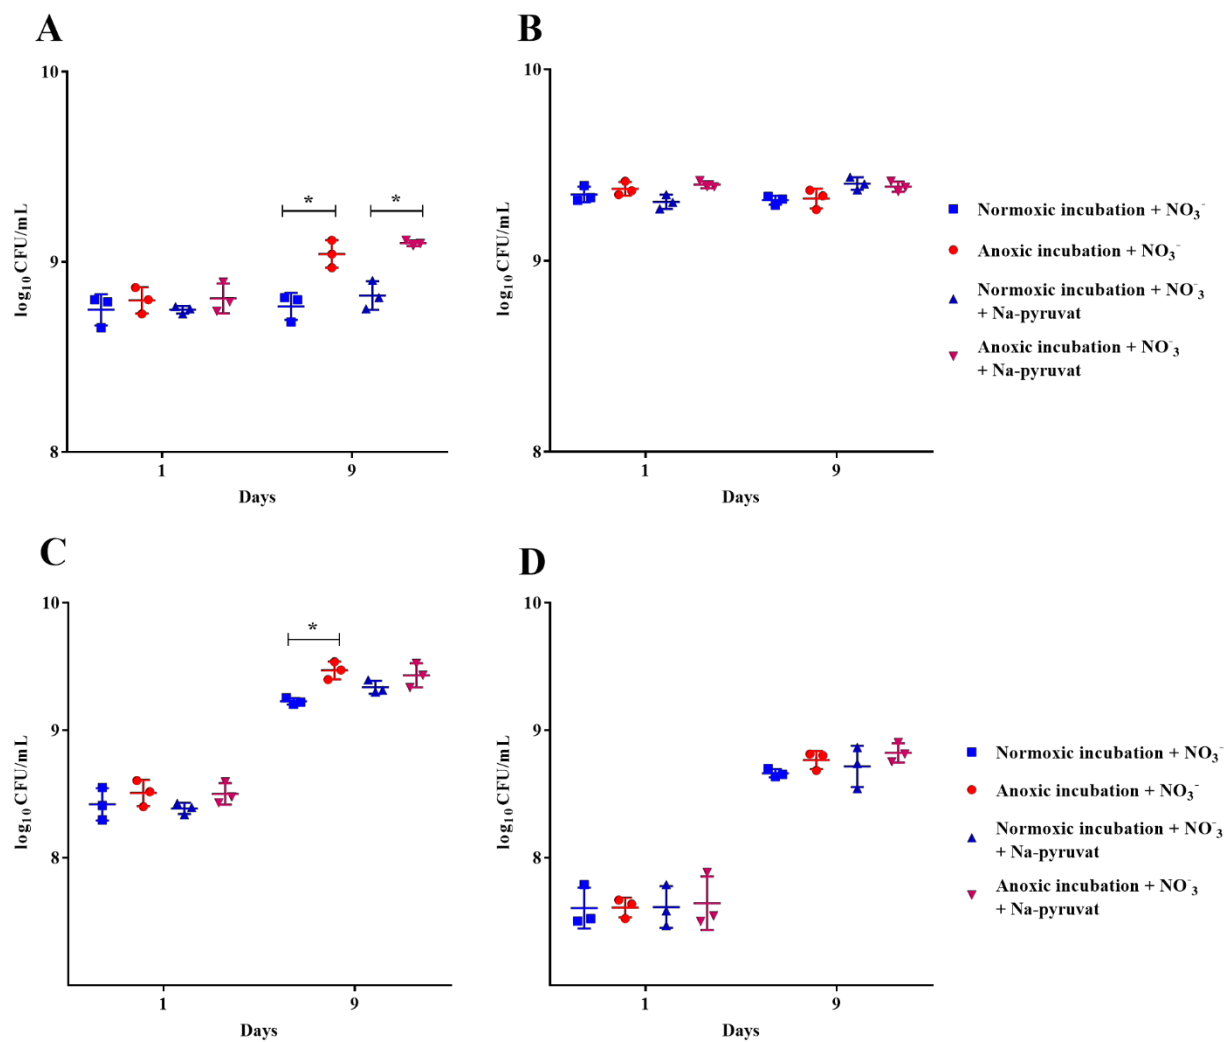

**Appendix Figure S3 - An oxygen intolerant subpopulation of *Staphylococcus aureus* (MRSA) and *Staphylococcus epidermidis* was induced in the filter biofilm model.**

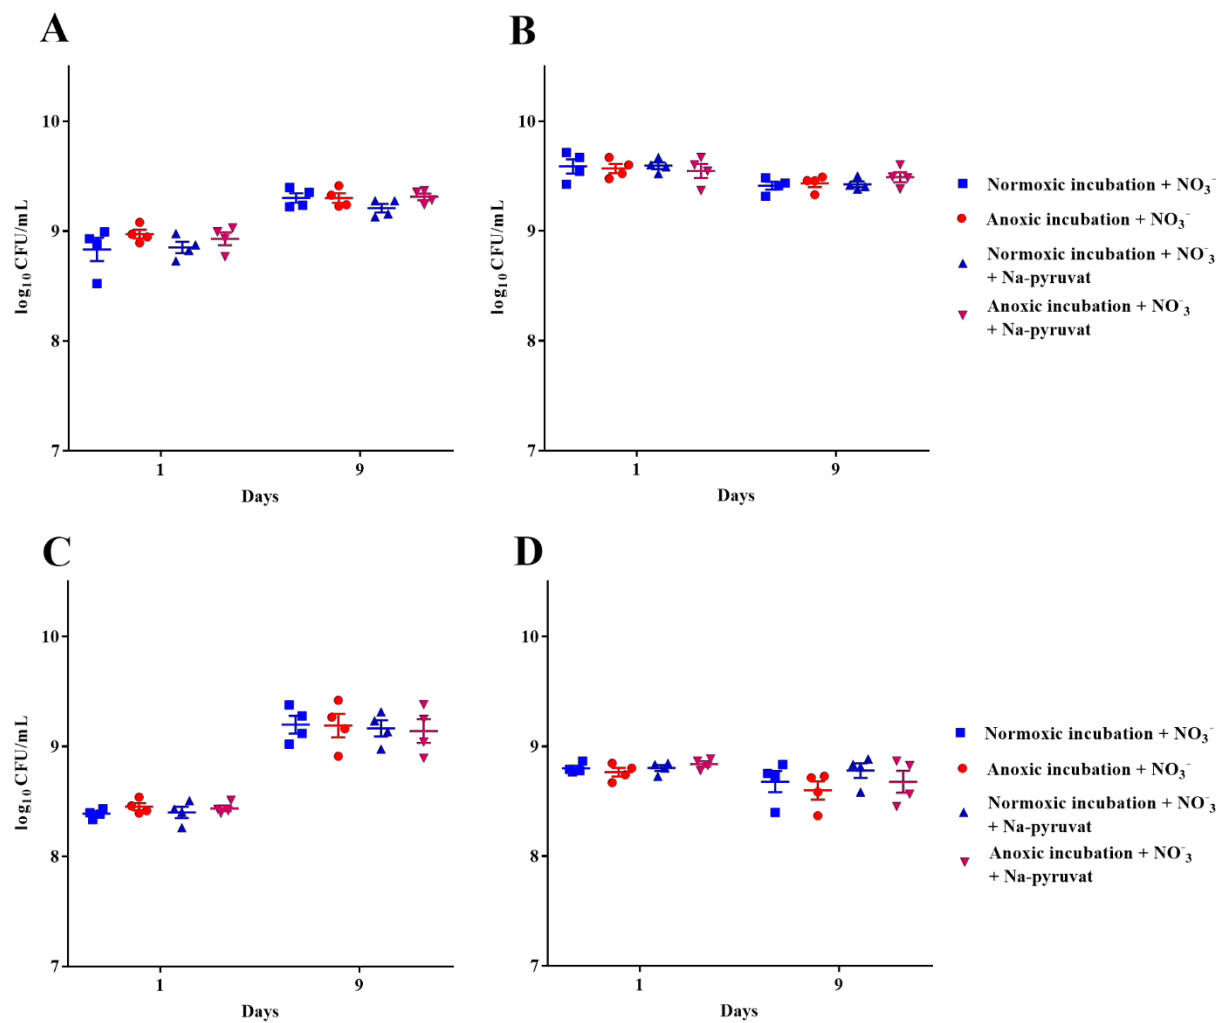

Appendix Figure S4 – Anoxic conditioning did not affect *Escherichia coli* or *Enterococcus faecalis* during growth in the filter biofilm model.

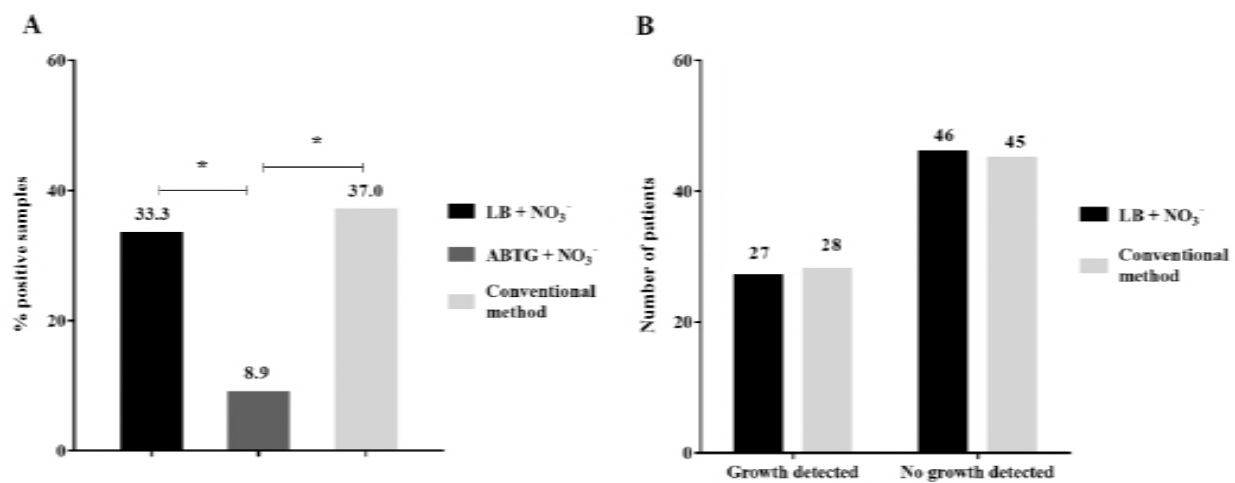

Appendix Figure S5 – Implementation of a supplementary diagnostic media at the Department of Clinical Microbiology, Rigshospitalet.
